# Supplementary material for: The decisive role of 4f-covalency in the structural direction and oxidation state of XPrO compounds (X: group 13 to 17 elements)
Source: Royal Society of Chemistry journal article supplement (doi:10.1039/d0cp04700g), 2020-01-01
Supplement: d0cp04700g1.pdf [file d0cp04700g1.pdf]

**The decisive role of 4f-covalency in structural direction and oxidation state of XPrO compounds (X: groups 13 to 17 elements)**

Wen-Jing Zhang,<sup>1</sup> Guan-Jun Wang,<sup>2</sup> Ping Zhang,<sup>3</sup> Wenli Zou,<sup>4</sup> Shu-Xian Hu,<sup>\*1,5</sup>

<sup>1</sup> Beijing Computational Science Research Center, Beijing 100193, China, <sup>2</sup> Department of Chemistry, Shanghai Key Laboratory of Molecular Catalysts and Innovative Materials, Fudan University, Shanghai 200433, China, <sup>3</sup> Laboratory of Computational Physics, Institute of Applied Physics and Computational Mathematics, Beijing 100088, China, <sup>4</sup> Institute of Modern Physics, Northwest University, and Shaanxi Key Laboratory for Theoretical Physics Frontiers, Xi'an, 710127, China, <sup>5</sup> Department of Physics, University of Science and Technology Beijing, Beijing 100083, China.

\*Corresponding Authors: hushuxian@csrc.ac.cn (S.X.H)

**Table S1.** Spin multiplicity, electronic configuration, state calculated relative energies (kcal mol<sup>-1</sup>) and geometries (bond lengths in Å, bond angles in degrees) of the BPrO and BOPr molecule and oxidation state of Pr at the B3LYP levels of theory.

| Structure                | BOPr                                                                        | BOPr                                                                   | BPrO                                                                                                                            | BOPr                                                                                                                                                                                                   |
|--------------------------|-----------------------------------------------------------------------------|------------------------------------------------------------------------|---------------------------------------------------------------------------------------------------------------------------------|--------------------------------------------------------------------------------------------------------------------------------------------------------------------------------------------------------|
| 2S+1                     | 5                                                                           | 3                                                                      | 5                                                                                                                               | 7                                                                                                                                                                                                      |
| State                    | <sup>5</sup> A''                                                            | <sup>3</sup> Δ                                                         | <sup>5</sup> A''                                                                                                                | <sup>7</sup> Σ                                                                                                                                                                                         |
| ΔE (B3LYP)               | 0.00                                                                        | 3.18                                                                   | 44.20                                                                                                                           | 77.60                                                                                                                                                                                                  |
| ΔE(CCSD(T))              | 0.00                                                                        | 3.55                                                                   |                                                                                                                                 |                                                                                                                                                                                                        |
| ΔE(DLPNO-CCSD(T))        | 0.00                                                                        | 23.88                                                                  | 62.87                                                                                                                           | 109.78                                                                                                                                                                                                 |
| Electronic configuration | f <sup>2</sup> 5d <sup>1</sup> 6s <sup>1</sup> σ <sub>2s</sub> <sup>2</sup> | f <sub>δ</sub> <sup>1</sup> f <sub>δ</sub> <sup>1</sup> σ <sup>2</sup> | f <sub>δ</sub> <sup>1</sup> f <sub>δ</sub> <sup>1</sup> σ <sup>1</sup> π <sub>//</sub> <sup>1</sup> π <sub>⊥</sub> <sup>0</sup> | s <sup>1</sup> d <sub>π</sub> <sup>1</sup> d <sub>π</sub> <sup>1</sup> f <sub>π</sub> <sup>1</sup> f <sub>π</sub> <sup>1</sup> σ <sup>1</sup> π <sub>//</sub> <sup>0</sup> π <sub>⊥</sub> <sup>0</sup> |
| OS                       | I                                                                           | III                                                                    | III                                                                                                                             | 0                                                                                                                                                                                                      |
| Symm.                    | C <sub>s</sub>                                                              | C <sub>∞v</sub>                                                        | C <sub>s</sub>                                                                                                                  | C <sub>∞v</sub>                                                                                                                                                                                        |
| E(B3LYP)                 | -563.18                                                                     | -560.00                                                                | -518.98                                                                                                                         | -485.58                                                                                                                                                                                                |
| SOC                      | -14.61                                                                      | -16.13                                                                 | -13.97                                                                                                                          | -15.74                                                                                                                                                                                                 |
| ΔE (B3LYP+SOC)           | 0.00                                                                        | 1.66                                                                   | 44.84                                                                                                                           | 76.47                                                                                                                                                                                                  |
| rPr-O                    | 2.194                                                                       | 2.136                                                                  | 1.831                                                                                                                           | 2.265                                                                                                                                                                                                  |
| rB-Pr                    |                                                                             |                                                                        | 2.497                                                                                                                           |                                                                                                                                                                                                        |
| rB-O                     | 1.278                                                                       | 1.290                                                                  |                                                                                                                                 | 1.259                                                                                                                                                                                                  |
| ∠B-Pr-O                  |                                                                             |                                                                        | 113.9                                                                                                                           |                                                                                                                                                                                                        |
| ∠B-O-Pr                  | 164.2                                                                       | 180.0                                                                  |                                                                                                                                 | 180.0                                                                                                                                                                                                  |
| vPr-O                    | 403.5                                                                       | 417.7                                                                  | 811.5                                                                                                                           | 270.0                                                                                                                                                                                                  |
| vB-Pr                    |                                                                             |                                                                        | 313.9                                                                                                                           |                                                                                                                                                                                                        |
| v(cm <sup>-1</sup> )B-O  | 1510.5                                                                      | 1455.3                                                                 |                                                                                                                                 | 1469.9                                                                                                                                                                                                 |

**Table S2.** Spin multiplicity, electronic configuration, state calculated relative energies (kcal mol<sup>-1</sup>) and geometries (bond lengths in Å, bond angles in degrees) of the AlPrO and AlOPr molecule and oxidation state of Pr at the B3LYP levels of theory.

| Structure                | AlOPr                                                                                                                                          |                                                                                                                                                                            |                                                                                                                                                | AlPrO                                                                                                                           | AlOPr                                                                                                                                                                      |
|--------------------------|------------------------------------------------------------------------------------------------------------------------------------------------|----------------------------------------------------------------------------------------------------------------------------------------------------------------------------|------------------------------------------------------------------------------------------------------------------------------------------------|---------------------------------------------------------------------------------------------------------------------------------|----------------------------------------------------------------------------------------------------------------------------------------------------------------------------|
|                          | 3                                                                                                                                              | 5                                                                                                                                                                          | 3                                                                                                                                              | 5                                                                                                                               | 7                                                                                                                                                                          |
| 2S+1                     | 3                                                                                                                                              | 5                                                                                                                                                                          | 3                                                                                                                                              | 5                                                                                                                               | 7                                                                                                                                                                          |
| State                    | <sup>3</sup> Σ                                                                                                                                 | <sup>5</sup> Φ                                                                                                                                                             | <sup>3</sup> Σ                                                                                                                                 | <sup>5</sup> A'                                                                                                                 | <sup>7</sup> Γ                                                                                                                                                             |
| ΔE(B3LYP)                | 0.00                                                                                                                                           | 16.04                                                                                                                                                                      | 30.33                                                                                                                                          | 30.78                                                                                                                           | 76.84                                                                                                                                                                      |
| ΔE(DLPNO-CCSD(T))        | 0.00                                                                                                                                           | 22.48                                                                                                                                                                      | 0.10                                                                                                                                           | 34.38                                                                                                                           | 93.36                                                                                                                                                                      |
| Electronic configuration | s <sup>2</sup> f <sub>δ</sub> <sup>1</sup> f <sub>δ</sub> <sup>1</sup> σ <sup>2</sup> π <sub>//</sub> <sup>0</sup> π <sub>⊥</sub> <sup>0</sup> | s <sup>1</sup> d <sub>π</sub> <sup>1</sup> f <sub>π</sub> <sup>1</sup> f <sub>π</sub> <sup>1</sup> σ <sup>2</sup> π <sub>//</sub> <sup>0</sup> π <sub>⊥</sub> <sup>0</sup> | s <sup>2</sup> f <sub>φ</sub> <sup>1</sup> f <sub>φ</sub> <sup>1</sup> σ <sup>2</sup> π <sub>//</sub> <sup>0</sup> π <sub>⊥</sub> <sup>0</sup> | f <sub>φ</sub> <sup>1</sup> f <sub>φ</sub> <sup>1</sup> σ <sup>1</sup> π <sub>//</sub> <sup>1</sup> π <sub>⊥</sub> <sup>0</sup> | s <sup>1</sup> d <sub>δ</sub> <sup>1</sup> f <sub>δ</sub> <sup>1</sup> f <sub>δ</sub> <sup>1</sup> σ <sup>1</sup> π <sub>//</sub> <sup>1</sup> π <sub>⊥</sub> <sup>0</sup> |
| OS                       | I                                                                                                                                              | I                                                                                                                                                                          | I                                                                                                                                              | III                                                                                                                             | I                                                                                                                                                                          |
| Symm.                    | C <sub>∞v</sub>                                                                                                                                | C <sub>∞v</sub>                                                                                                                                                            | C <sub>∞v</sub>                                                                                                                                | C <sub>s</sub>                                                                                                                  | C <sub>∞v</sub>                                                                                                                                                            |
| E(B3LYP)                 | -522.66                                                                                                                                        | -506.62                                                                                                                                                                    | -492.33                                                                                                                                        | -491.88                                                                                                                         | -445.82                                                                                                                                                                    |
| SOC                      | -8.23                                                                                                                                          | -8.26                                                                                                                                                                      | -8.23                                                                                                                                          | -14.20                                                                                                                          | -8.27                                                                                                                                                                      |
| ΔE (B3LYP+SOC)           | 0.00                                                                                                                                           | 16.01                                                                                                                                                                      | 30.33                                                                                                                                          | 24.81                                                                                                                           | 76.80                                                                                                                                                                      |
| rPr-O                    | 2.104                                                                                                                                          | 2.163                                                                                                                                                                      | 2.107                                                                                                                                          | 1.839                                                                                                                           | 2.173                                                                                                                                                                      |
| rAl-Pr                   |                                                                                                                                                |                                                                                                                                                                            |                                                                                                                                                | 3.099                                                                                                                           |                                                                                                                                                                            |
| rAl-O                    | 1.747                                                                                                                                          | 1.739                                                                                                                                                                      | 1.750                                                                                                                                          |                                                                                                                                 | 1.719                                                                                                                                                                      |
| ∠Al-Pr-O                 |                                                                                                                                                |                                                                                                                                                                            |                                                                                                                                                | 96.1                                                                                                                            |                                                                                                                                                                            |
| ∠Al-O-Pr                 | 180.0                                                                                                                                          | 180.0                                                                                                                                                                      | 180.0                                                                                                                                          |                                                                                                                                 | 180.0                                                                                                                                                                      |

|                                   |       |       |       |       |       |
|-----------------------------------|-------|-------|-------|-------|-------|
| $\nu(\text{cm}^{-1})\text{Pr-O}$  |       |       |       | 803.5 |       |
| $\nu(\text{cm}^{-1})\text{Al-Pr}$ |       |       |       | 178.6 |       |
| $\nu_3(\text{cm}^{-1})$           | 853.6 | 848.5 | 848.8 |       | 883.5 |
| $\nu_1(\text{cm}^{-1})$           | 338.6 | 315.8 | 337.3 |       | 313.8 |

**Table S3.** Spin multiplicity, electronic configuration, state calculated relative energies ( $\text{kcal mol}^{-1}$ ) and geometries (bond lengths in Å, bond angles in degrees) of the CPrO molecule and oxidation state of Pr at the B3LYP levels of theory.

|                                  |                                         |                                           |                                                     |
|----------------------------------|-----------------------------------------|-------------------------------------------|-----------------------------------------------------|
| 2S+1                             | 4                                       | 4                                         | 6                                                   |
| State                            | $^4\Gamma$                              | $^4\Phi$                                  | $^6A'$                                              |
| $\Delta E(\text{B3LYP})$         | 0.00                                    | 5.21                                      | 6.03                                                |
| $\Delta E(\text{CCSD(T)})$       | 14.00                                   |                                           | 0.00                                                |
| $\Delta E(\text{DMRG-CASPT2})$   | 16.60                                   |                                           | 0.00                                                |
| $\Delta E(\text{DLPNO-CCSD(T)})$ | 7.16                                    | 7.28                                      | 0.00                                                |
| Electronic configuration         | $f_\phi^1\sigma^1\pi_{//}^2\pi_\perp^1$ | $f_\delta^1\sigma^1\pi_{//}^2\pi_\perp^1$ | $f_\delta^1f_\delta^1\sigma^1\pi_{//}^1\pi_\perp^1$ |
| OS                               | IV                                      | IV                                        | III                                                 |
| Symm.                            | $C_{2v}$                                | $C_{2v}$                                  | $C_s$                                               |
| E(B3LYP)                         | -558.57                                 | -553.36                                   | -552.54                                             |
| SOC                              | -15.89                                  | -15.98                                    | -16.98                                              |
| $\Delta E(\text{B3LYP+SOC})$     | 0.00                                    | 5.12                                      | 4.94                                                |
| rPr-O                            | 1.819                                   | 1.808                                     | 1.823                                               |
| rC-Pr                            | 2.008                                   | 1.994                                     | 2.441                                               |
| $\angle\text{C-Pr-O}$            | 180.0                                   | 180.0                                     | 123.8                                               |
| $\nu(\text{cm}^{-1})\text{Pr-O}$ | 781.6                                   | 799.3                                     | 820.9                                               |
| $\nu(\text{cm}^{-1})\text{C-Pr}$ | 589.8                                   | 603.3                                     | 415.6                                               |

**Table S4.** Spin multiplicity, electronic configuration, state calculated relative energies ( $\text{kcal mol}^{-1}$ ) and geometries (bond lengths in Å, bond angles in degrees) of the SiPrO and SiOPr molecule and oxidation state of Pr at the B3LYP levels of theory.

| Structure                        | SiOPr                              |                                      | SiPrO                                           |                                         | SiOPr                                               |
|----------------------------------|------------------------------------|--------------------------------------|-------------------------------------------------|-----------------------------------------|-----------------------------------------------------|
| 2S+1                             | 4                                  | 6                                    | 6                                               | 4                                       | 8                                                   |
| State                            | $^4A''$                            | $^6A'$                               | $^6A'$                                          | $^4A''$                                 | $^8\Delta$                                          |
| $\Delta E(\text{B3LYP})$         | 0.00                               | 5.65                                 | 16.15                                           | 26.40                                   | 95.92                                               |
| $\Delta E(\text{DLPNO-CCSD(T)})$ | 0.00                               | 8.17                                 | 12.68                                           | 34.58                                   | 108.69                                              |
| Electronic configuration         | $f_\phi^1f_\pi^1\pi_{\text{Si}}^1$ | $s^1f_\delta^1f_\delta^1d^1\sigma^1$ | $f_\phi^1f_\phi^1\sigma^1\pi_{//}^1\pi_\perp^1$ | $f_\phi^1\sigma^1\pi_{//}^2\pi_\perp^1$ | $s^1f_\pi^1f_\pi^1d^1\sigma^1\pi_{//}^1\pi_\perp^1$ |
| OS                               | II                                 | I                                    | III                                             | IV                                      | I                                                   |
| Symm.                            | $C_s$                              | $C_s$                                | $C_s$                                           | $C_s$                                   | $C_{2v}$                                            |
| E(B3LYP)                         | -548.13                            | -542.48                              | -531.98                                         | -521.73                                 | -452.21                                             |
| SOC                              | -14.41                             | -14.36                               | -13.89                                          | -13.73                                  | -16.27                                              |
| $\Delta E(\text{B3LYP+SOC})$     | 0.00                               | 5.70                                 | 16.67                                           | 27.08                                   | 94.06                                               |
| rPr-O                            | 2.030                              | 2.090                                | 1.840                                           | 1.829                                   | 2.127                                               |
| rSi-Pr                           | 2.842                              | 2.876                                | 2.972                                           | 2.610                                   |                                                     |

|                             |       |       |       |       |       |
|-----------------------------|-------|-------|-------|-------|-------|
| rSi-O                       | 1.736 | 1.703 |       |       | 1.668 |
| $\angle$ Si-Pr-O            |       |       | 169.0 | 120.9 |       |
| $\angle$ Si-O-Pr            | 97.7  | 98.1  |       |       | 180.0 |
| $\nu(\text{cm}^{-1})$ Pr-O  |       |       | 810.5 | 797.9 |       |
| $\nu(\text{cm}^{-1})$ Si-Pr |       |       | 218.6 | 313.8 |       |
| $\nu_3(\text{cm}^{-1})$     | 484.0 | 418.7 |       |       | 881.5 |
| $\nu_1(\text{cm}^{-1})$     | 667.7 | 721.5 |       |       | 315.4 |

**Table S5.** Spin multiplicity, electronic configuration, oxidation state of Pr, symmetry, Calculated relative energies (kcal mol<sup>-1</sup>) and geometries (bond lengths in Å, bond angles in degrees) of the neutral NPrO molecule at the B3LYP levels of theory. And the comparison between the observed and calculated vibrational frequencies (cm<sup>-1</sup>) of NPrO.

|                                     |                             |                               |                                    |                          |                             |
|-------------------------------------|-----------------------------|-------------------------------|------------------------------------|--------------------------|-----------------------------|
| 2S+1                                | 1                           | 3                             | 5                                  | Expl. <sup>ref1</sup>    | B3LYP <sup>ref1</sup>       |
| State                               | <sup>1</sup> $\Sigma$       | <sup>3</sup> $\Delta$         | <sup>5</sup> A''                   |                          |                             |
| $\Delta E(\text{B3LYP})$            | 0.00                        | 12.89                         | 48.78                              |                          |                             |
| $\Delta E(\text{DLPNO-CCSD(T)})$    | 0.00                        | 20.50                         | 52.35                              |                          |                             |
| Electronic configuration            | $f^0\sigma^2\pi_x^2\pi_y^2$ | $f_d^1\sigma^1\pi_x^2\pi_y^2$ | $f_d^1f_d^1\sigma^1\pi_x^2\pi_y^1$ |                          | $f^0\sigma^2\pi_x^2\pi_y^2$ |
| OS                                  | V                           | IV                            | III                                | V                        | V                           |
| Symm.                               | $C_{\infty v}$              | $C_{\infty v}$                | $C_s$                              |                          |                             |
| E(B3LYP)                            | -671.36                     | -658.47                       | -622.58                            |                          |                             |
| SOC                                 | -12.53                      | -12.44                        | -13.68                             |                          |                             |
| $\Delta E(\text{B3LYP}+\text{SOC})$ | 0.00                        | 12.98                         | 47.63                              |                          |                             |
| rPr-O                               | 1.798                       | 1.829                         | 1.853                              |                          | 1.765                       |
| rN-Pr                               | 1.708                       | 1.808                         | 2.219                              |                          | 1.677                       |
| $\angle$ N-Pr-O                     | 180.0                       | 180.0                         | 116.4                              |                          | 180.0                       |
| $\nu(\text{cm}^{-1})$ Pr-O          | 818.7                       | 731.6                         | 795.4                              | 762.2/755.9 <sup>a</sup> | 822.1                       |
| $\nu(\text{cm}^{-1})$ N-Pr          | 1016.8                      | 821.0                         | 446.1                              | 926.2/918.5 <sup>a</sup> | 1021.1                      |

<sup>a</sup>Two site absorptions.

**Table S6.** Spin multiplicity, electronic configuration, state calculated relative energies (kcal mol<sup>-1</sup>) and geometries (bond lengths in Å, bond angles in degrees) of the PPrO molecule and oxidation state of Pr at the B3LYP levels of theory.

|                                  |                               |                                    |                             |
|----------------------------------|-------------------------------|------------------------------------|-----------------------------|
| 2S+1                             | 3                             | 5                                  | 1                           |
| State                            | <sup>3</sup> $\Delta$         | <sup>5</sup> A''                   | <sup>1</sup> A'             |
| $\Delta E(\text{B3LYP})$         | 0.00                          | 7.37                               | 15.84                       |
| $\Delta E(\text{CCSD(T)})$       | 0.00                          | 12.76                              |                             |
| $\Delta E(\text{DLPNO-CCSD(T)})$ | 0.00                          | 2.46                               | 16.78                       |
| Electronic configuration         | $f_d^1\sigma^1\pi_x^2\pi_y^2$ | $f_d^1f_d^1\sigma^1\pi_x^2\pi_y^1$ | $f^0\sigma^2\pi_x^2\pi_y^2$ |
| OS                               | IV                            | III                                | V                           |
| Symm.                            | $C_{\infty v}$                | $C_s$                              | $C_s$                       |
| E(B3LYP)                         | -563.66                       | -556.29                            | -547.82                     |
| SOC                              | -16.05                        | -14.76                             | -13.65                      |

|                            |       |       |       |
|----------------------------|-------|-------|-------|
| $\Delta E$ (B3LYP+SOC)     | 0.00  | 8.66  | 18.24 |
| rPr-O                      | 1.815 | 1.841 | 1.796 |
| rP-Pr                      | 2.383 | 2.756 | 2.297 |
| $\angle$ P-Pr-O            | 180.0 | 119.9 | 161.0 |
| $\nu(\text{cm}^{-1})$ Pr-O | 816.7 | 812.5 | 851.8 |
| $\nu(\text{cm}^{-1})$ P-Pr | 386.3 | 290.2 | 448.5 |

**Table S7.** Spin multiplicity, electronic configuration, state calculated relative energies (kcal mol<sup>-1</sup>) and geometries (bond lengths in Å, bond angles in degrees) of the AsPrO molecule and oxidation state of Pr at the B3LYP levels of theory.

|                             |                                                |                                                             |                                                            |
|-----------------------------|------------------------------------------------|-------------------------------------------------------------|------------------------------------------------------------|
| 2S+1                        | 3                                              | 5                                                           | 5                                                          |
| State                       | <sup>3</sup> Φ                                 | <sup>5</sup> A'                                             | <sup>5</sup> A'                                            |
| $\Delta E$ (B3LYP)          | 0.00                                           | 0.17                                                        | 27.04                                                      |
| $\Delta E$ (CCSD(T))        | 35.82                                          | 0.00                                                        |                                                            |
| $\Delta E$ (DLPNO-CCSD(T))  | 23.56                                          | 0.00                                                        | 8.31                                                       |
| Electronic configuration    | $f_{\phi}^1 \sigma^1 \pi_{//}^2 \pi_{\perp}^2$ | $f_{\delta}^1 f_{\phi}^1 \sigma^1 \pi_{//}^1 \pi_{\perp}^2$ | $d_{\pi}^1 f_{\sigma}^1 \sigma^1 \pi_{//}^1 \pi_{\perp}^2$ |
| OS                          | IV                                             | III                                                         | III                                                        |
| Symm.                       | $C_{\infty v}$                                 | $C_s$                                                       | $C_s$                                                      |
| E(B3LYP)                    | -554.44                                        | -552.74                                                     | -527.40                                                    |
| SOC                         | -17.40                                         | -15.96                                                      | -15.79                                                     |
| $\Delta E$ (B3LYP+SOC)      | 0.00                                           | 3.14                                                        | 28.65                                                      |
| rPr-O                       | 1.822                                          | 1.841                                                       | 2.050                                                      |
| rAs-Pr                      | 2.511                                          | 3.023                                                       | 2.909                                                      |
| $\angle$ As-Pr-O            | 180.0                                          | 109.8                                                       | 39.95                                                      |
| $\nu(\text{cm}^{-1})$ Pr-O  | 804.9                                          | 811.0                                                       | 499.7 ( $\nu_3$ )                                          |
| $\nu(\text{cm}^{-1})$ As-Pr | 261.5                                          | 161.1                                                       | 580.2 ( $\nu_1$ )                                          |

**Table S8.** Spin multiplicity, electronic configuration, oxidation state of Pr, symmetry, Calculated relative energies (kcal mol<sup>-1</sup>) and geometries (bond lengths in Å, bond angles in degrees) of the neutral PrO<sub>2</sub> molecule at the B3LYP levels of theory. And the comparison between the observed and calculated vibrational frequencies (cm<sup>-1</sup>) of PrO<sub>2</sub>.

|                            |                                                  |                                                             |                       |                                         |
|----------------------------|--------------------------------------------------|-------------------------------------------------------------|-----------------------|-----------------------------------------|
| 2S+1                       | 2                                                | 4                                                           | Expl. <sup>ref2</sup> | B3LYP <sup>ref2</sup>                   |
| State                      | <sup>2</sup> Δ <sub>u</sub>                      | <sup>4</sup> A <sub>2</sub>                                 |                       |                                         |
| $\Delta E$ (B3LYP)         | 0.00                                             | 43.22                                                       |                       |                                         |
| $\Delta E$ (DLPNO-CCSD(T)) | 0.00                                             | 54.76                                                       |                       |                                         |
| Electronic configuration   | $f_{\delta}^1 \sigma^2 \pi_{//}^2 \pi_{\perp}^2$ | $f_{\delta}^1 f_{\phi}^1 \sigma^1 \pi_{//}^2 \pi_{\perp}^2$ |                       | $f^1 \sigma^2 \pi_{//}^2 \pi_{\perp}^2$ |
| OS                         | IV                                               | III                                                         | IV                    | IV                                      |
| Symm.                      | $D_{2h}$                                         | $C_{2v}$                                                    |                       |                                         |
| E(B3LYP)                   | -659.75                                          | -616.53                                                     |                       |                                         |
| SOC                        | -16.48                                           | -16.27                                                      |                       |                                         |
| $\Delta E$ (B3LYP+SOC)     | 0.00                                             | 43.43                                                       |                       |                                         |

|                       |       |       |       |       |
|-----------------------|-------|-------|-------|-------|
| rPr-O                 | 1.812 | 1.938 |       | 1.810 |
| rO-Pr                 | 1.812 | 1.938 |       | 1.810 |
| ∠O-Pr-O               | 180.0 | 140.2 |       | 180.0 |
| v3(cm <sup>-1</sup> ) | 812.1 | 229.0 | 694.2 | 783.2 |
| v1(cm <sup>-1</sup> ) | 759.6 | 635.5 | 730.3 | 730.8 |

**Table S9.** Spin multiplicity, electronic configuration, oxidation state of Pr, symmetry, Calculated relative energies (kcal mol<sup>-1</sup>) and geometries (bond lengths in Å, bond angles in degrees) of the neutral [PrO<sub>2</sub>]<sup>+</sup> molecule at the B3LYP levels of theory. And the comparison between the observed and calculated vibrational frequencies (cm<sup>-1</sup>) of [PrO<sub>2</sub>]<sup>+</sup>.

| 2S+1                     | 1                                                                                     | 3                                                                                                  | 5                                                                                                                                                                                                     | Expl.ref <sup>2</sup> | B3LYP <sup>ref2</sup>                                                                 |
|--------------------------|---------------------------------------------------------------------------------------|----------------------------------------------------------------------------------------------------|-------------------------------------------------------------------------------------------------------------------------------------------------------------------------------------------------------|-----------------------|---------------------------------------------------------------------------------------|
| State                    | <sup>1</sup> Σ <sub>u</sub>                                                           | <sup>3</sup> Δ <sub>u</sub>                                                                        | <sup>5</sup> A <sub>2</sub>                                                                                                                                                                           |                       |                                                                                       |
| ΔE(B3LYP)                | 0.00                                                                                  | 22.37                                                                                              | 96.90                                                                                                                                                                                                 |                       |                                                                                       |
| ΔE(DLPNO-CCSD(T))        | 0.00                                                                                  | 36.14                                                                                              | 93.35                                                                                                                                                                                                 |                       |                                                                                       |
| Electronic configuration | f <sup>0</sup> σ <sup>2</sup> π <sub>g</sub> <sup>2</sup> π <sub>u</sub> <sup>2</sup> | f <sub>g</sub> <sup>1</sup> σ <sup>1</sup> π <sub>g</sub> <sup>2</sup> π <sub>u</sub> <sup>2</sup> | f <sub>g</sub> <sup>1</sup> f <sub>g</sub> <sup>1</sup> σ <sup>1</sup> π <sub>g</sub> <sup>2</sup> π <sub>u</sub> <sup>2</sup> σ <sup>1</sup> π <sub>g</sub> <sup>2</sup> π <sub>u</sub> <sup>2</sup> |                       | f <sup>0</sup> σ <sup>2</sup> π <sub>g</sub> <sup>2</sup> π <sub>u</sub> <sup>2</sup> |
| OS                       | V                                                                                     | IV                                                                                                 | III                                                                                                                                                                                                   | V                     | V                                                                                     |
| Symm.                    | D <sub>2h</sub>                                                                       | D <sub>2h</sub>                                                                                    | C <sub>2v</sub>                                                                                                                                                                                       |                       | D <sub>∞h</sub>                                                                       |
| E(B3LYP)                 | -523.14                                                                               | -500.77                                                                                            | -426.24                                                                                                                                                                                               |                       |                                                                                       |
| SOC                      | -12.50                                                                                | -12.29                                                                                             | -12.31                                                                                                                                                                                                |                       |                                                                                       |
| ΔE (B3LYP+SOC)           | 0.00                                                                                  | 22.58                                                                                              | 97.09                                                                                                                                                                                                 |                       |                                                                                       |
| rPr-O                    | 1.671                                                                                 | 1.781                                                                                              | 1.980                                                                                                                                                                                                 |                       | 1.688                                                                                 |
| rO-Pr                    | 1.671                                                                                 | 1.781                                                                                              | 1.980                                                                                                                                                                                                 |                       | 1.688                                                                                 |
| ∠O-Pr-O                  | 180.0                                                                                 | 180.0                                                                                              | 125.1                                                                                                                                                                                                 |                       | 180.0                                                                                 |
| v3(cm <sup>-1</sup> )    | 1128.6                                                                                | 739.7                                                                                              | 453.0                                                                                                                                                                                                 |                       | 1020.9                                                                                |
| v1(cm <sup>-1</sup> )    | 991.4                                                                                 | 755.0                                                                                              | 643.4                                                                                                                                                                                                 |                       | 882.0                                                                                 |

**Table S10.** Spin multiplicity, electronic configuration, state calculated relative energies (kcal mol<sup>-1</sup>) and geometries (bond lengths in Å, bond angles in degrees) of the SPrO molecule and oxidation state of Pr at the B3LYP levels of theory.

| 2S+1                     | 2                                                                                                  | 4                                                                                                                              |
|--------------------------|----------------------------------------------------------------------------------------------------|--------------------------------------------------------------------------------------------------------------------------------|
| State                    | <sup>2</sup> A'                                                                                    | <sup>4</sup> Σ                                                                                                                 |
| ΔE(B3LYP)                | 0.00                                                                                               | 40.28                                                                                                                          |
| ΔE(DLPNO-CCSD(T))        | 0.00                                                                                               | 19.94                                                                                                                          |
| Electronic configuration | f <sub>g</sub> <sup>1</sup> σ <sup>2</sup> π <sub>g</sub> <sup>2</sup> π <sub>u</sub> <sup>2</sup> | f <sub>g</sub> <sup>1</sup> f <sub>g</sub> <sup>1</sup> σ <sup>1</sup> π <sub>g</sub> <sup>2</sup> π <sub>u</sub> <sup>2</sup> |
| OS                       | IV                                                                                                 | III                                                                                                                            |
| Symm.                    | C <sub>s</sub>                                                                                     | C <sub>∞v</sub>                                                                                                                |
| E(B3LYP)                 | -603.34                                                                                            | -563.06                                                                                                                        |
| SOC                      | -16.31                                                                                             | -16.04                                                                                                                         |
| ΔE (B3LYP+SOC)           | 0.00                                                                                               | 40.55                                                                                                                          |
| rPr-O                    | 1.817                                                                                              | 1.856                                                                                                                          |
| rS-Pr                    | 2.412                                                                                              | 2.573                                                                                                                          |

|                            |       |       |
|----------------------------|-------|-------|
| $\angle$ S-Pr-O            | 134.1 | 180.0 |
| $\nu(\text{cm}^{-1})$ Pr-O | 799.3 | 712.4 |
| $\nu(\text{cm}^{-1})$ S-Pr | 603.3 | 245.8 |

**Table S11.** Spin multiplicity, electronic configuration, state calculated relative energies ( $\text{kcal mol}^{-1}$ ) and geometries (bond lengths in Å, bond angles in degrees) of the  $[\text{SPrO}]^+$  molecule and oxidation state of Pr at the B3LYP levels of theory.

|                                     |                                             |                                               |                                      |
|-------------------------------------|---------------------------------------------|-----------------------------------------------|--------------------------------------|
| 2S+1                                | 3                                           | 3                                             | 1                                    |
| State                               | $^3\Phi$                                    | $^3\Delta$                                    | $^1\Sigma$                           |
| $\Delta E(\text{B3LYP})$            | 0.00                                        | 1.61                                          | 1.74                                 |
| $\Delta E(\text{CCSD(T)})$          | 0.00                                        | 6.38                                          |                                      |
| $\Delta E(\text{DLPNO-CCSD(T)})$    | 9.20                                        | 8.54                                          | 0.00                                 |
| Electronic configuration            | $f_{\phi}^1\sigma^1\pi_{//}^2\pi_{\perp}^2$ | $f_{\delta}^1\sigma^1\pi_{//}^2\pi_{\perp}^2$ | $f^0\sigma^2\pi_{//}^2\pi_{\perp}^2$ |
| OS                                  | IV                                          | IV                                            | V                                    |
| Symm.                               | $C_{\sigma v}$                              | $C_{\sigma v}$                                | $C_{\sigma v}$                       |
| E(B3LYP)                            | -415.16                                     | -413.55                                       | -413.42                              |
| SOC                                 | -12.33                                      | -12.31                                        | -12.27                               |
| $\Delta E(\text{B3LYP}+\text{SOC})$ | 0.00                                        | 1.63                                          | 1.80                                 |
| rPr-O                               | 1.765                                       | 1.757                                         | 1.731                                |
| rS-Pr                               | 2.383                                       | 2.368                                         | 2.259                                |
| $\angle$ S-Pr-O                     | 180.0                                       | 180.0                                         | 180.0                                |
| $\nu(\text{cm}^{-1})$ Pr-O          | 876.4                                       | 893.3                                         | 941.4                                |
| $\nu(\text{cm}^{-1})$ S-Pr          | 356.5                                       | 364.4                                         | 478.9                                |

**Table S12.** Spin multiplicity, electronic configuration, oxidation state of Pr, symmetry, Calculated relative energies ( $\text{kcal mol}^{-1}$ ) and geometries (bond lengths in Å, bond angles in degrees) of the neutral FPrO molecule at the B3LYP levels of theory. And the comparison between the observed and calculated vibrational frequencies ( $\text{cm}^{-1}$ ) of FPrO.

|                                     |                                                           |                                                       |                                                         |                                                              |                       |                                      |
|-------------------------------------|-----------------------------------------------------------|-------------------------------------------------------|---------------------------------------------------------|--------------------------------------------------------------|-----------------------|--------------------------------------|
| 2S+1                                | 3                                                         | 3                                                     | 3                                                       | 5                                                            | Expl.ref <sup>3</sup> | B3LYP <sup>ref3</sup>                |
| State                               | $^3A''$                                                   | $^3A''$                                               | $^3A'$                                                  | $^5A''$                                                      |                       |                                      |
| $\Delta E(\text{B3LYP})$            | 0.00                                                      | 0.22                                                  | 0.83                                                    | 66.49                                                        |                       |                                      |
| $\Delta E(\text{DLPNO-CCSD(T)})$    | 0.00                                                      | 0.39                                                  | 3.00                                                    | 64.65                                                        |                       |                                      |
| Electronic configuration            | $f_{\delta}^1f_{\delta}^1\sigma^2\pi_{//}^2\pi_{\perp}^2$ | $f_{\phi}^1f_{\phi}^1\sigma^2\pi_{//}^2\pi_{\perp}^2$ | $f_{\delta}^1f_{\phi}^1\sigma^2\pi_{//}^2\pi_{\perp}^2$ | $s^1f_{\delta}^1f_{\delta}^1\sigma^2\pi_{//}^2\pi_{\perp}^1$ |                       | $f^2\sigma^2\pi_{//}^2\pi_{\perp}^2$ |
| OS                                  | III                                                       | III                                                   | III                                                     | II                                                           | III                   | III                                  |
| Symm.                               | $C_s$                                                     | $C_s$                                                 | $C_s$                                                   | $C_s$                                                        |                       |                                      |
| E(B3LYP)                            | -648.25                                                   | -648.03                                               | -647.42                                                 | -581.76                                                      |                       |                                      |
| E(B3LYP)                            | -648.25                                                   | -648.03                                               | -647.42                                                 | -581.76                                                      |                       |                                      |
| SOC                                 | -13.95                                                    | -13.95                                                | -13.95                                                  | -16.13                                                       |                       |                                      |
| $\Delta E(\text{B3LYP}+\text{SOC})$ | 0.00                                                      | 0.22                                                  | 0.83                                                    | 64.31                                                        |                       |                                      |
| rPr-O                               | 1.855                                                     | 1.855                                                 | 1.855                                                   | 2.163                                                        |                       | 1.836                                |
| rF-Pr                               | 2.133                                                     | 2.134                                                 | 2.134                                                   | 2.059                                                        |                       | 2.122                                |

|                            |       |       |       |       |       |       |
|----------------------------|-------|-------|-------|-------|-------|-------|
| $\angle$ F-Pr-O            | 114.2 | 114.6 | 114.7 | 114.4 |       | 114.1 |
| $\nu(\text{cm}^{-1})$ Pr-O | 798.1 | 794.2 | 777.3 | 501.5 | 767.5 | 794.0 |
| $\nu(\text{cm}^{-1})$ F-Pr | 474.9 | 478.2 | 461.7 | 545.8 | 451.2 | 502.0 |

**Table S13.** Spin multiplicity, electronic configuration, state calculated relative energies ( $\text{kcal mol}^{-1}$ ) and geometries (bond lengths in Å, bond angles in degrees) of the  $\text{F}_3\text{PrO}$  molecule and oxidation state of Pr at the B3LYP levels of theory.

|                                           |                                      |                                            |                                                           |
|-------------------------------------------|--------------------------------------|--------------------------------------------|-----------------------------------------------------------|
| 2S+1                                      | 1                                    | 3                                          | 5                                                         |
| State                                     | $^1\text{A}'$                        | $^3\text{A}''$                             | $^5\text{A}'$                                             |
| $\Delta\text{E}(\text{B3LYP})$            | 0.00                                 | 14.53                                      | 61.61                                                     |
| $\Delta\text{E}(\text{DLPNO-CCSD(T)})$    | 0.00                                 | 10.56                                      | 83.80                                                     |
| Electronic configuration                  | $f^0\sigma^2\pi_{//}^2\pi_{\perp}^2$ | $f_{\pi}^1\sigma^2\pi_{//}^2\pi_{\perp}^1$ | $f_{\delta}^1f_{\delta}^1\sigma^2\pi_{//}^1\pi_{\perp}^1$ |
| OS                                        | V                                    | IV                                         | III                                                       |
| Symm.                                     | $C_s$                                | $C_s$                                      | $C_s$                                                     |
| E(B3LYP)                                  | -957.88                              | -943.35                                    | -896.27                                                   |
| SOC                                       | -12.45                               | -14.15                                     | -15.83                                                    |
| $\Delta\text{E}(\text{B3LYP}+\text{SOC})$ | 0.00                                 | 12.83                                      | 58.23                                                     |
| rPr-O                                     | 1.794                                | 2.142                                      | 2.869                                                     |
| rF-Pr                                     | 2.048                                | 2.051                                      | 2.113                                                     |
| $\angle$ F-Pr-O                           | 113.0, 116.7                         | 107.2, 113.7                               | 88.7, 116.3                                               |
| $\nu(\text{cm}^{-1})$ Pr-O                | 813.4                                | 446.4                                      | 153.8                                                     |
| $\nu(\text{cm}^{-1})$ F-Pr                | 564.2                                | 551.7                                      | 503.7                                                     |

**Table S14.** Spin multiplicity, electronic configuration, state calculated relative energies ( $\text{kcal mol}^{-1}$ ) and geometries (bond lengths in Å, bond angles in degrees) of the  $\text{ClPrO}$  molecule and oxidation state of Pr at the B3LYP levels of theory.

|                                           |                                                           |                                                       |                                                         |                                                          |
|-------------------------------------------|-----------------------------------------------------------|-------------------------------------------------------|---------------------------------------------------------|----------------------------------------------------------|
| 2S+1                                      | 3                                                         | 3                                                     | 3                                                       | 5                                                        |
| State                                     | $^3\text{A}''$                                            | $^3\text{A}''$                                        | $^3\text{A}'$                                           | $^5\text{A}''$                                           |
| $\Delta\text{E}(\text{B3LYP})$            | 0.00                                                      | 0.17                                                  | 1.12                                                    | 72.84                                                    |
| $\Delta\text{E}(\text{DLPNO-CCSD(T)})$    | 0.00                                                      | 2.66                                                  | 0.03                                                    | 72.99                                                    |
| Electronic configuration                  | $f_{\delta}^1f_{\delta}^1\sigma^2\pi_{//}^2\pi_{\perp}^2$ | $f_{\phi}^1f_{\phi}^1\sigma^2\pi_{//}^2\pi_{\perp}^2$ | $f_{\delta}^1f_{\phi}^1\sigma^2\pi_{//}^2\pi_{\perp}^2$ | $s^1f_{\phi}^1f_{\phi}^1\sigma^1\pi_{//}^2\pi_{\perp}^2$ |
| OS                                        | III                                                       | III                                                   | III                                                     | II                                                       |
| Symm.                                     | $C_s$                                                     | $C_s$                                                 | $C_s$                                                   | $C_s$                                                    |
| E(B3LYP)                                  | -590.19                                                   | -590.02                                               | -589.07                                                 | -517.35                                                  |
| SOC                                       | -16.97                                                    | -16.98                                                | -16.14                                                  | -14.06                                                   |
| $\Delta\text{E}(\text{B3LYP}+\text{SOC})$ | 0.00                                                      | 0.16                                                  | 1.95                                                    | 75.75                                                    |
| rPr-O                                     | 1.841                                                     | 1.842                                                 | 1.842                                                   | 2.025                                                    |
| rCl-Pr                                    | 2.654                                                     | 2.652                                                 | 2.654                                                   | 2.582                                                    |
| $\angle$ Cl-Pr-O                          | 118.9                                                     | 117.3                                                 | 117.8                                                   | 157.9                                                    |
| $\nu(\text{cm}^{-1})$ Pr-O                | 811.4                                                     | 816.1                                                 | 806.3                                                   | 502.1                                                    |
| $\nu(\text{cm}^{-1})$ Cl-Pr               | 293.4                                                     | 296.3                                                 | 282.6                                                   | 299.4                                                    |



**Table S15.** Spin multiplicity, electronic configuration, state calculated relative energies (kcal mol<sup>-1</sup>) and geometries (bond lengths in Å, bond angles in degrees) of the Cl<sub>3</sub>PrO molecule and oxidation state of Pr at the B3LYP levels of theory.

|                           |                                                                                       |                                                                                                    |
|---------------------------|---------------------------------------------------------------------------------------|----------------------------------------------------------------------------------------------------|
| 2S+1                      | 1                                                                                     | 3                                                                                                  |
| State                     | <sup>1</sup> A'                                                                       | <sup>3</sup> A''                                                                                   |
| ΔE(B3LYP)                 | 0.00                                                                                  | 18.90                                                                                              |
| ΔE(DLPNO-CCSD(T))         | 0.00                                                                                  | 15.79                                                                                              |
| Electronic configuration  | f <sup>0</sup> σ <sup>2</sup> π <sub>z</sub> <sup>2</sup> π <sub>⊥</sub> <sup>2</sup> | f <sub>π</sub> <sup>1</sup> σ <sup>2</sup> π <sub>z</sub> <sup>2</sup> π <sub>⊥</sub> <sup>1</sup> |
| OS                        | V                                                                                     | IV                                                                                                 |
| Symm.                     | C <sub>s</sub>                                                                        | C <sub>s</sub>                                                                                     |
| E(B3LYP)                  | -771.59                                                                               | -752.69                                                                                            |
| SOC                       | -12.68                                                                                | -13.32                                                                                             |
| ΔE (B3LYP+SOC)            | 0.00                                                                                  | 18.26                                                                                              |
| rPr-O                     | 1.773                                                                                 | 2.094                                                                                              |
| rCl-Pr                    | 2.518                                                                                 | 2.515                                                                                              |
| ∠Cl-Pr-O                  | 111.7,117.6                                                                           | 106.8,113.1                                                                                        |
| ν(cm <sup>-1</sup> )Pr-O  | 848.8                                                                                 | 525.4                                                                                              |
| ν(cm <sup>-1</sup> )Cl-Pr | 331.8                                                                                 | 340.7                                                                                              |

**Table S16.** The Natural Localized Molecular Orbital Analysis of the Bonds in XPrO (X: C, Si, N, P, As, O, S, F and Cl) Complexes

| Species             | Pr-O/X | NLMO                                                                            | ΘA-ΘB |
|---------------------|--------|---------------------------------------------------------------------------------|-------|
| CPrO                | Pr-O   | 76.50% O(sp <sup>8.00</sup> ) +23.48%Pr(s <sup>0.02</sup> d <sup>1.37</sup> f)  | 53.02 |
|                     |        | 85.68% O(sp <sup>1.00</sup> ) +14.29%Pr(s <sup>0.05</sup> d <sup>3.42</sup> f)  | 71.39 |
|                     |        | 85.89% O(sp <sup>99.99</sup> ) +14.04%Pr(s <sup>0.03</sup> d <sup>2.42</sup> f) | 71.85 |
|                     | Pr-C   | 88.64% C(sp <sup>1.00</sup> ) +11.30%Pr(s <sup>0.43</sup> d <sup>11.44</sup> f) | 77.34 |
|                     |        | 84.48% C(sp <sup>6.64</sup> ) +15.47%Pr(s <sup>0.85</sup> d <sup>2.86</sup> f)  | 69.01 |
| NPrO                | Pr-O   | 85.29% O(sp <sup>1.00</sup> ) +14.70%Pr(s <sup>0.02</sup> d <sup>0.94</sup> f)  | 70.59 |
|                     |        | 85.29% O(sp <sup>1.00</sup> ) +14.70%Pr(s <sup>0.02</sup> d <sup>0.94</sup> f)  | 70.59 |
|                     |        | 65.39% O(sp <sup>7.17</sup> ) +32.67%Pr(s <sup>0.03</sup> d <sup>0.42</sup> f)  | 32.72 |
|                     | Pr-N   | 70.96% N(sp <sup>1.00</sup> ) +29.04%Pr(s <sup>0.01</sup> d <sup>0.89</sup> f)  | 41.92 |
|                     |        | 70.96% N(sp <sup>1.00</sup> ) +29.04%Pr(s <sup>0.01</sup> d <sup>0.89</sup> f)  | 41.92 |
|                     |        | 35.19% N(sp <sup>8.58</sup> ) +62.28%Pr(s <sup>0.03</sup> d <sup>0.26</sup> f)  | 27.09 |
| OPrO                | Pr-O   | 87.52% O(sp <sup>1.00</sup> ) +12.46%Pr(s <sup>0.04</sup> d <sup>1.40</sup> f)  | 75.06 |
|                     |        | 87.52% O(sp <sup>1.00</sup> ) +12.46%Pr(s <sup>0.04</sup> d <sup>1.40</sup> f)  | 75.06 |
|                     |        | 69.94% O(sp <sup>7.88</sup> ) +29.38%Pr(s <sup>0.03</sup> d <sup>0.35</sup> f)  | 40.56 |
|                     | Pr-O   | 87.52% O(sp <sup>1.00</sup> ) +12.46%Pr(s <sup>0.04</sup> d <sup>1.40</sup> f)  | 75.06 |
|                     |        | 87.52% O(sp <sup>1.00</sup> ) +12.46%Pr(s <sup>0.04</sup> d <sup>1.40</sup> f)  | 75.06 |
|                     |        | 69.94% O(sp <sup>7.88</sup> ) +29.38%Pr(s <sup>0.03</sup> d <sup>0.35</sup> f)  | 40.56 |
| [OPrO] <sup>+</sup> | Pr-O   | 81.46% O(sp <sup>1.00</sup> ) +18.51%Pr(s <sup>0.01</sup> d <sup>1.00</sup> f)  | 62.95 |

|                     |                       |                                                                                   |       |
|---------------------|-----------------------|-----------------------------------------------------------------------------------|-------|
|                     |                       | 81.46% O(sp <sup>1.00</sup> ) + 18.51%Pr(s <sup>0.01</sup> d <sup>1.00</sup> f)   | 62.95 |
|                     |                       | 56.64% O(sp <sup>6.46</sup> ) + 41.37%Pr(s <sup>0.02</sup> d <sup>0.31</sup> f)   | 15.27 |
|                     | Pr-O                  | 81.46% O(sp <sup>1.00</sup> ) + 18.51%Pr(s <sup>0.01</sup> d <sup>1.00</sup> f)   | 62.95 |
|                     |                       | 81.46% O(sp <sup>1.00</sup> ) + 18.51%Pr(s <sup>0.01</sup> d <sup>1.00</sup> f)   | 62.95 |
|                     |                       | 56.64% O(sp <sup>6.46</sup> ) + 41.37%Pr(s <sup>0.02</sup> d <sup>0.31</sup> f)   | 15.27 |
| FPrO                | Pr-O                  | 80.27% O(sp <sup>6.56</sup> ) + 19.72%Pr(s <sup>0.01</sup> d <sup>1.37</sup> f)   | 60.55 |
|                     |                       | 87.36% O(sp <sup>1.00</sup> ) + 12.64%Pr(s <sup>0.09</sup> d <sup>4.62</sup> f)   | 74.72 |
|                     |                       | 86.64% O(sp <sup>99.99</sup> ) + 13.34%Pr(s <sup>0.03</sup> d <sup>2.59</sup> f)  | 73.30 |
|                     | Pr-F                  | 94.23% F(sp <sup>4.40</sup> ) + 5.73%Pr(s <sup>0.41</sup> d <sup>3.69</sup> f)    | 88.50 |
| F <sub>3</sub> PrO  | Pr-O                  | 62.75% O(sp <sup>11.33</sup> ) + 37.23%Pr(s <sup>0.01</sup> d <sup>1.00</sup> f)  | 25.52 |
|                     |                       | 80.64% O(sp <sup>1.00</sup> ) + 19.30%Pr(s <sup>0.01</sup> d <sup>0.69</sup> f)   | 61.34 |
|                     |                       | 80.23% O(sp <sup>99.99</sup> ) + 19.72%Pr(s <sup>0.01</sup> d <sup>0.63</sup> f)  | 60.51 |
|                     | Pr-F(F <sub>3</sub> ) | 89.14% F(sp <sup>4.54</sup> ) + 10.80%Pr(s <sup>0.11</sup> d <sup>0.95</sup> f)   | 78.34 |
|                     |                       | 89.14% F(sp <sup>4.54</sup> ) + 10.80%Pr(s <sup>0.11</sup> d <sup>0.95</sup> f)   | 78.34 |
|                     |                       | 89.04% F(sp <sup>4.61</sup> ) + 10.95%Pr(s <sup>0.09</sup> d <sup>0.90</sup> f)   | 78.09 |
|                     |                       | 93.17% F(sp <sup>99.99</sup> ) + 6.68%Pr(s <sup>0.01</sup> d <sup>0.01</sup> f)   | 86.49 |
| PPrO                | Pr-O                  | 87.59% O(sp <sup>1.00</sup> ) + 12.27%Pr(s <sup>0.02</sup> d <sup>1.87</sup> f)   | 75.32 |
|                     |                       | 75.27% O(sp <sup>6.90</sup> ) + 18.68%Pr(s <sup>0.12</sup> d <sup>2.95</sup> f)   | 56.59 |
|                     |                       | 98.26% O(sp <sup>0.09</sup> ) + 1.50%Pr(s <sup>20.00</sup> d <sup>16.40</sup> f)  | 96.76 |
|                     | Pr-P                  | 80.51% P(sp <sup>1.00</sup> ) + 19.42%Pr(s <sup>0.07</sup> d <sup>2.27</sup> f)   | 61.09 |
|                     |                       | 34.21% P(sp <sup>27.66</sup> ) + 62.30%Pr(s <sup>0.01</sup> d <sup>0.01</sup> f)  | 28.09 |
|                     |                       | 98.12% P(sp <sup>0.03</sup> ) + 1.75%Pr(s <sup>9.09</sup> d <sup>7.45</sup> f)    | 96.37 |
| SPrO                | Pr-O                  | 81.46% O(sp <sup>7.89</sup> ) + 18.48%Pr(s <sup>0.03</sup> d <sup>1.32</sup> f)   | 62.98 |
|                     |                       | 86.76% O(sp <sup>1.00</sup> ) + 13.18%Pr(s <sup>0.03</sup> d <sup>2.45</sup> f)   | 73.58 |
|                     |                       | 84.84% O(sp <sup>27.17</sup> ) + 15.09%Pr(s <sup>0.01</sup> d <sup>1.00</sup> f)  | 69.75 |
|                     | Pr-S                  | 89.58% S(sp <sup>99.99</sup> ) + 10.36%Pr(s <sup>0.01</sup> d <sup>30.01</sup> f) | 79.22 |
|                     |                       | 87.97% S(sp <sup>1.00</sup> ) + 11.97%Pr(s <sup>0.07</sup> d <sup>3.79</sup> f)   | 76.00 |
|                     |                       | 83.90% S(sp <sup>4.80</sup> ) + 16.04%Pr(s <sup>0.36</sup> d <sup>2.40</sup> f)   | 67.86 |
| [SPrO] <sup>+</sup> | Pr-O                  | 82.70% O(sp <sup>1.00</sup> ) + 17.26%Pr(s <sup>0.01</sup> d <sup>1.00</sup> f)   | 65.44 |
|                     |                       | 82.70% O(sp <sup>1.00</sup> ) + 17.26%Pr(s <sup>0.01</sup> d <sup>1.00</sup> f)   | 65.44 |
|                     |                       | 59.48% O(sp <sup>8.75</sup> ) + 37.61%Pr(s <sup>0.01</sup> d <sup>0.34</sup> f)   | 21.87 |
|                     | Pr-S                  | 78.03% S(sp <sup>1.00</sup> ) + 21.97%Pr(s <sup>0.03</sup> d <sup>0.97</sup> f)   | 56.06 |
|                     |                       | 78.03% S(sp <sup>1.00</sup> ) + 21.97%Pr(s <sup>0.03</sup> d <sup>0.97</sup> f)   | 56.06 |
|                     |                       | 47.14% S(sp <sup>22.16</sup> ) + 49.95%Pr(s <sup>0.01</sup> d <sup>1.00</sup> f)  | 2.81  |
| ClPrO               | Pr-O                  | 87.37% O(sp <sup>1.00</sup> ) + 12.63%Pr(s <sup>0.07</sup> d <sup>3.94</sup> f)   | 74.74 |
|                     |                       | 79.56% O(sp <sup>1.00</sup> ) + 20.42%Pr(s <sup>0.02</sup> d <sup>1.89</sup> f)   | 59.14 |
|                     |                       | 87.80% O(sp <sup>99.99</sup> ) + 12.14%Pr(s <sup>0.02</sup> d <sup>1.78</sup> f)  | 75.66 |
|                     | Pr-Cl                 | 92.48% Cl(sp <sup>5.70</sup> ) + 7.46%Pr(s <sup>1.41</sup> d <sup>5.65</sup> f)   | 85.02 |
| Cl <sub>3</sub> PrO | Pr-O                  | 66.27% O(sp <sup>9.00</sup> ) + 33.69%Pr(s <sup>0.01</sup> d <sup>1.00</sup> f)   | 32.58 |

|       |                         |                                                                                    |       |
|-------|-------------------------|------------------------------------------------------------------------------------|-------|
|       |                         | 79.50% O(sp <sup>99.99</sup> ) + 20.43%Pr(s <sup>0.01</sup> d <sup>0.01</sup> f)   | 59.07 |
|       |                         | 79.92% O(sp <sup>1.00</sup> ) + 20.01%Pr(s <sup>0.01</sup> d <sup>1.00</sup> f)    | 59.91 |
|       | Pr-Cl(Cl <sub>3</sub> ) | 86.25% Cl(sp <sup>10.37</sup> ) + 13.55%Pr(s <sup>0.18</sup> d <sup>1.08</sup> f)  | 72.70 |
|       |                         | 90.50% Cl(sp <sup>99.99</sup> ) + 9.29%Pr(s <sup>0.01</sup> d <sup>1.00</sup> f)   | 81.21 |
|       |                         | 88.51% Cl(sp <sup>12.00</sup> ) + 11.31%Pr(s <sup>0.17</sup> d <sup>1.40</sup> f)  | 77.20 |
|       |                         | 84.73% Cl(sp <sup>8.21</sup> ) + 15.15%Pr(s <sup>0.17</sup> d <sup>1.05</sup> f)   | 69.58 |
|       |                         | 90.85% Cl(sp <sup>1.00</sup> ) + 8.86%Pr(s <sup>0.01</sup> d <sup>0.01</sup> f)    | 81.99 |
|       |                         | 89.48% Cl(sp <sup>16.17</sup> ) + 10.30%Pr(s <sup>0.13</sup> d <sup>1.28</sup> f)  | 79.18 |
| AsPrO | Pr-O                    | 85.32% O(sp <sup>1.00</sup> ) + 14.67%Pr(s <sup>0.04</sup> d <sup>3.38</sup> f)    | 75.32 |
|       |                         | 84.20% O(sp <sup>45.43</sup> ) + 15.78%Pr(s <sup>0.01</sup> d <sup>1.20</sup> f)   | 68.42 |
|       |                         | 78.80% O(sp <sup>9.82</sup> ) + 21.17%Pr(s <sup>0.01</sup> d <sup>0.01</sup> f)    | 57.63 |
|       | Pr-As                   | 96.05% As(sp <sup>99.99</sup> ) + 3.83%Pr(s <sup>0.09</sup> d <sup>2.69</sup> f)   | 92.22 |
|       |                         | 94.94% As(sp <sup>1.00</sup> ) + 5.01%Pr(s <sup>3.23</sup> d <sup>82.42</sup> f)   | 89.93 |
|       |                         | 81.86% As(sp <sup>18.50</sup> ) + 18.07%Pr(s <sup>11.11</sup> d <sup>9.22</sup> f) | 63.79 |

**Table S17.** The Natural Localized Molecular Orbital Analysis of the Bonds in XOPr (X: B, Al and Si) Complexes

| Species | Pr-O/X | NLMO                                                                                | ΘA-ΘB |
|---------|--------|-------------------------------------------------------------------------------------|-------|
| BOPr    | B-O    | 85.84% O(sp <sup>0.81</sup> ) + 14.01%B(sp <sup>14.89</sup> )                       | 71.83 |
|         |        | 89.87% O(sp <sup>1.00</sup> ) + 8.43%B(sp <sup>1.00</sup> )                         | 81.44 |
|         |        | 89.86% O(sp <sup>99.99</sup> ) + 8.34%B(sp <sup>99.99</sup> )                       | 81.52 |
|         | Pr-O   | 96.79% O(sp <sup>1.23</sup> ) + 3.01%Pr(s <sup>0.41</sup> d <sup>6.27</sup> f)      | 93.78 |
| AlOPr   | Al-O   | 93.69% O(sp <sup>1.00</sup> ) + 3.42%Al(sp <sup>1.00</sup> )                        | 90.27 |
|         |        | 96.22% O(sp <sup>0.01</sup> ) + 1.89%Al(sd <sup>11.63</sup> )                       | 94.33 |
|         | Pr-O   | 93.21% O(sp <sup>99.99</sup> ) + 3.48%Pr(s <sup>0.22</sup> d <sup>4.43</sup> f)     | 89.73 |
| SiOPr   | Si-O   | 86.45% O(sp <sup>3.56</sup> ) + 12.37%Si(sp <sup>9.93</sup> )                       | 74.08 |
|         |        | 88.08% O(sp <sup>1.00</sup> ) + 7.75%Si(sp <sup>1.00</sup> )                        | 80.33 |
|         | Pr-O   | 90.69% O(sp <sup>8.32</sup> ) + 8.83%Pr(s <sup>0.06</sup> d <sup>4.41</sup> f)      | 81.86 |
|         | Pr-Si  | 60.23% Si(sp <sup>21.98</sup> ) + 39.67%Pr(s <sup>50.00</sup> d <sup>19.00</sup> f) | 20.56 |

**Table S18.** Correlation of Pr oxidation state and the σ-component (%Pr) of NLMO in X-Pr as well as the corresponding contribution ratio of 4f:5d.

| σ-bond                      | 4f:5d  | OS(Pr) | %Pr   |
|-----------------------------|--------|--------|-------|
| C-Pr                        | 0.3497 | III    | 27.91 |
| N-Pr                        | 3.8462 | V      | 62.28 |
| O-Pr                        | 2.8571 | IV     | 29.38 |
| O-Pr ([OPrO] <sup>+</sup> ) | 3.2258 | V      | 41.37 |
| F-Pr                        | 0.2710 | III    | 5.73  |
| F-Pr ([F <sub>3</sub> PrO]) | 1.0526 | V      | 10.95 |

|                               |        |     |       |
|-------------------------------|--------|-----|-------|
| P-Pr                          | 0.4405 | IV  | 19.42 |
| S-Pr                          | 0.4167 | IV  | 16.04 |
| S-Pr ([SPrO] <sup>+</sup> )   | 1.0000 | V   | 49.95 |
| Cl-Pr                         | 0.1770 | III | 7.46  |
| Cl-Pr ([Cl <sub>3</sub> PrO]) | 1.1013 | V   | 13.69 |
| As-Pr                         | 0.1085 | III | 18.07 |

**Table S19.** Energy decomposition analysis of ground state XPrO at the B3LYP/TZ2P level. Energy values are given in kcal/mol.

| Species             | EDA                     |                           |                            |                         | ETS-NOCV                  |                           |                           |                                                                                      |                                                                                       |                                                                                       |  |
|---------------------|-------------------------|---------------------------|----------------------------|-------------------------|---------------------------|---------------------------|---------------------------|--------------------------------------------------------------------------------------|---------------------------------------------------------------------------------------|---------------------------------------------------------------------------------------|--|
|                     | $\Delta E_{\text{int}}$ | $\Delta E_{\text{Pauli}}$ | $\Delta E_{\text{elstat}}$ | $\Delta E_{\text{orb}}$ | $\Delta E_1^{\text{orb}}$ | $\Delta E_2^{\text{orb}}$ | $\Delta E_3^{\text{orb}}$ | Contours                                                                             |                                                                                       |                                                                                       |  |
|                     |                         |                           |                            |                         |                           |                           |                           | Orb1                                                                                 | Orb2                                                                                  | Orb3                                                                                  |  |
| CPrO                | -300.09                 | 151.58                    | -215.11                    | -236.56                 | -49.1                     | -55.0                     | -71.6                     |    |    |    |  |
| NPrO                | -<br>1513.50            | 922.33                    | -<br>1562.53               | -873.30                 | -<br>178.7                | -<br>112.0                | -<br>112.0                |    |    |    |  |
| OPrO                | -771.33                 | 603.66                    | -936.85                    | -438.14                 | -85.0                     | -93.9                     | -41.3                     |  |  |  |  |
| [OPrO] <sup>+</sup> | -<br>1123.09            | 871.16                    | -<br>1321.40               | -672.85                 | -<br>154.9                | -77.5                     | -77.5                     |  |  |  |  |
| FPrO                | -268.27                 | 149.49                    | -258.25                    | -159.51                 | -41.9                     | -36.7                     | -18.1                     |  |  |  |  |
| F <sub>3</sub> PrO  | -<br>1434.10            | 369.05                    | -<br>1375.85               | -427.30                 | -41.3                     | -40.7                     | -27.2                     |  |  |  |  |
| PPrO                | -615.72                 | 330.84                    | -602.54                    | -344.01                 | -86.4                     | -68.8                     | -68.8                     |  |  |  |  |
| SPrO                | -653.38                 | 286.41                    | -640.13                    | -299.66                 | -93.5                     | -64.1                     | -36.3                     |  |  |  |  |
| [SPrO] <sup>+</sup> | -996.73                 | 404.75                    | -903.61                    | -497.87                 | -<br>108.2                | -63.6                     | -63.6                     |  |  |  |  |
| ClPrO               | -222.02                 | 92.57                     | -191.31                    | -123.28                 | -39.6                     | -37.9                     | -14.8                     |  |  |  |  |

|                     |              |        |              |         |       |       |       |                                                                                    |                                                                                     |                                                                                     |
|---------------------|--------------|--------|--------------|---------|-------|-------|-------|------------------------------------------------------------------------------------|-------------------------------------------------------------------------------------|-------------------------------------------------------------------------------------|
| Cl <sub>3</sub> PrO | -<br>1259.39 | 264.70 | -<br>1061.79 | -462.31 | -45.8 | -44.2 | -29.6 | 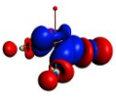 |  |  |
| AsPrO               | -252.80      | 78.38  | -159.27      | -171.91 | -47.9 | -49.9 | -50.4 |  |  |  |

**Table S20.** Calculated charge and spin populations on X, Pr and O atoms of the XPrO molecule at the B3LYP levels of theory.

| Species             | Atom               | Charge   |           |        |        | Spin     |        |        |
|---------------------|--------------------|----------|-----------|--------|--------|----------|--------|--------|
|                     |                    | Mulliken | Hirshfeld | NPA    | MDC_q  | Mulliken | NPA    | MDC_q  |
| BOPr                | B                  | 0.244    | -0.094    | 0.416  | 0.150  | -0.015   | 0.024  | -0.169 |
|                     | O                  | -0.666   | -0.376    | -1.257 | -0.886 | -0.074   | -0.001 | 0.129  |
|                     | Pr                 | 0.422    | 0.470     | 0.841  | 0.736  | 4.089    | 3.977  | 4.039  |
| CPrO                | C                  | -0.567   | -0.346    | -0.610 | -0.647 | 2.707    | 2.638  | 2.635  |
|                     | O                  | -0.719   | -0.557    | -1.000 | -1.073 | -0.039   | -0.041 | -0.038 |
|                     | Pr                 | 1.286    | 0.903     | 1.611  | 1.720  | 2.332    | 2.403  | 2.403  |
| NPrO                | N                  | -0.578   | -0.594    | -0.726 | -0.929 | 0.000    | 0.000  | 0.000  |
|                     | O                  | -0.693   | -0.515    | -0.782 | -0.718 | 0.000    | 0.000  | 0.000  |
|                     | Pr                 | 1.271    | 1.109     | 1.508  | 1.648  | 0.000    | 0.000  | 0.000  |
| OPrO                | O                  | -0.771   | -0.547    | -0.861 | -0.820 | -0.073   | -0.061 | -0.076 |
|                     | Pr                 | 1.542    | 1.095     | 1.722  | 1.641  | 1.145    | 1.123  | 1.152  |
| [OPrO] <sup>+</sup> | O(+)               | -0.465   | -0.312    | -0.500 | -0.457 | 0.000    | 0.000  | 0.000  |
|                     | Pr                 | 1.929    | 1.625     | 2.001  | 1.914  | 0.000    | 0.000  | 0.000  |
| FPrO                | F                  | -0.611   | -0.42     | -0.725 | -0.809 | -0.015   | -0.012 | 0.019  |
|                     | O                  | -0.690   | -0.577    | -1.037 | -1.118 | -0.073   | -0.054 | -0.03  |
|                     | Pr                 | 1.301    | 0.997     | 1.762  | 1.927  | 2.088    | 2.065  | 2.011  |
| F <sub>3</sub> PrO  | F(F <sub>3</sub> ) | -0.490   | -0.305    | -0.513 | -0.408 | 0.000    | 0.000  | 0.000  |
|                     | O                  | -0.566   | -0.341    | -0.472 | -0.328 | 0.000    | 0.000  | 0.000  |
|                     | Pr                 | 2.036    | 1.257     | 2.012  | 1.551  | 0.000    | 0.000  | 0.000  |
| AlOPr               | Al                 | 0.521    | 0.266     | 0.768  | 0.061  | 0.004    | -0.006 | -0.001 |
|                     | O                  | -0.711   | -0.536    | -1.515 | -0.165 | -0.021   | -0.031 | -0.029 |
|                     | Pr                 | 0.190    | 0.270     | 0.747  | 0.104  | 2.017    | 2.036  | 2.03   |
| SiOPr               | Si                 | 0.209    | 0.047     | 0.411  | 0.410  | 0.016    | -0.042 | -0.030 |
|                     | O                  | -0.637   | -0.434    | -1.218 | -1.105 | -0.074   | -0.027 | 0.079  |
|                     | Pr                 | 0.429    | 0.388     | 0.807  | 0.695  | 3.058    | 3.069  | 2.951  |
| PPrO                | P                  | -0.672   | -0.452    | -0.595 | -0.530 | 0.412    | 0.198  | 0.565  |
|                     | O                  | -0.699   | -0.518    | -0.878 | -0.497 | -0.090   | -0.134 | 0.009  |
|                     | Pr                 | 1.370    | 0.970     | 1.474  | 1.026  | 1.678    | 1.936  | 1.426  |
| SPrO                | S                  | -0.687   | -0.505    | -0.718 | -0.748 | -0.180   | -0.512 | -0.173 |
|                     | O                  | -0.592   | -0.501    | -0.863 | -1.005 | -0.078   | -0.191 | -0.091 |

|                     |                      |        |        |        |        |        |        |        |
|---------------------|----------------------|--------|--------|--------|--------|--------|--------|--------|
|                     | Pr                   | 1.278  | 1.006  | 1.581  | 1.753  | 1.258  | 1.703  | 1.263  |
| [SPrO] <sup>+</sup> | S(+)                 | -0.253 | -0.123 | -0.178 | -0.152 | 0.000  | 0.000  | 0.000  |
|                     | O                    | -0.495 | -0.331 | -0.605 | -0.326 | 0.000  | 0.000  | 0.000  |
|                     | Pr                   | 1.748  | 1.454  | 1.783  | 1.478  | 0.000  | 0.000  | 0.000  |
| ClPrO               | Cl                   | -0.642 | -0.398 | -0.727 | -0.633 | -0.008 | -0.008 | -0.007 |
|                     | O                    | -0.658 | -0.558 | -1.012 | -1.103 | -0.056 | -0.084 | -0.057 |
|                     | Pr                   | 1.300  | 0.957  | 1.739  | 1.736  | 2.064  | 2.093  | 2.064  |
| Cl <sub>3</sub> PrO | Cl(Cl <sub>3</sub> ) | -0.422 | -0.193 | -0.299 | -0.496 | 0.000  | 0.000  | 0.000  |
|                     | O                    | -0.510 | -0.338 | -0.489 | -0.943 | 0.000  | 0.000  | 0.000  |
|                     | Pr                   | 1.775  | 0.919  | 1.386  | 2.426  | 0.000  | 0.000  | 0.000  |
| AsPrO               | As                   | -0.460 | -0.252 | -0.520 | -0.383 | 1.903  | 1.940  | 1.934  |
|                     | O                    | -0.621 | -0.551 | -1.010 | -1.157 | -0.050 | -0.052 | -0.058 |
|                     | Pr                   | 1.081  | 0.803  | 1.530  | 1.539  | 2.150  | 2.112  | 2.124  |

**Table S21.** Energies and percent compositions of the occupied valence molecular orbitals of BOPr at the B3LYP and M06-HF levels of theory.

| MOs  | Isosurface | type                   | Energy      | Occ | B3LYP |       |        |        | M06-HF |    |        |       |
|------|------------|------------------------|-------------|-----|-------|-------|--------|--------|--------|----|--------|-------|
|      |            |                        |             |     | Pr    |       | O      | B      | Pr     |    | O      | B     |
|      |            |                        |             |     | 5d    | 4f    | 2p     | 2p     | 5d     | 4f | 2p     | 2p    |
| 1a'' |            | $\pi_{\text{Pr-O}}$    | -<br>10.339 | 2   | 3.19% |       | 82.22% | 11.72% | 2.94%  |    | 69.49% | 2.50% |
| 2a'  |            | $\pi_{\text{Pr-O}}$    | -<br>10.357 | 2   | 2.45% | 1.08% | 82.28% | 11.57% | 1.42%  |    | 84.81% | 7.95% |
| 1a'  |            | $\sigma_{\text{Pr-O}}$ | -<br>13.053 | 2   | 5.19% |       | 72.12% | 3.09%  | 1.93%  |    | 86.28% | 8.08% |

**Table S22.** Energies and percent compositions of the occupied valence molecular orbitals of AlOPr at the M06-HF levels of theory.

| MOs         | Isosurface | type                   | Energy | Occ | B3LYP |        |        |        | M06-HF |        |        |        |
|-------------|------------|------------------------|--------|-----|-------|--------|--------|--------|--------|--------|--------|--------|
|             |            |                        |        |     | Pr    |        | O      | Al     | Pr     |        | O      | Al     |
|             |            |                        |        |     | 5d    | 4f     | 2p     | 2p     | 5d     | 4f     | 2p     | 2p     |
| 3 $\sigma$  |            | Pr-6s                  | -3.933 | 2   | 7.89% |        |        |        | 19.87% |        |        |        |
| 1 $\delta'$ |            | Pr-<br>4f <sub>5</sub> | -5.564 | 1   |       | 99.22% |        |        |        | 97.46% |        |        |
| 1 $\delta$  |            | Pr-<br>4f <sub>5</sub> | -5.564 | 1   |       | 99.22% |        |        |        | 97.46% |        |        |
| 2 $\sigma$  |            | Al-3s                  | -6.223 | 2   | 2.29% |        | 8.70%  | 14.85% | 1.75%  |        | 4.71%  | 13.01% |
| 1 $\pi'$    |            | $\pi_{\text{Pr-O}}$    | -8.859 | 2   | 5.91% | 1.32%  | 84.82% | 4.70%  | 4.35%  | 3.00%  | 87.39% | 2.38%  |

|            |  |                        |             |   |       |       |        |       |        |       |        |       |
|------------|--|------------------------|-------------|---|-------|-------|--------|-------|--------|-------|--------|-------|
| 1 $\pi$    |  | $\pi_{\text{Pr-O}}$    | -8.859      | 2 | 5.91% | 1.32% | 84.82% | 4.70% | 4.35%  | 3.00% | 87.39% | 2.38% |
| 1 $\sigma$ |  | $\sigma_{\text{Pr-O}}$ | -<br>10.756 | 2 | 7.59% | 1.77% | 70.88% |       | 10.01% | 1.60% | 67.91% | 1.34% |

**Table S23.** Energies and percent compositions of the occupied valence molecular orbitals of CPRo at the B3LYP and M06-HF levels of theory.

| MOs  | Isosurface | type                   | Energy | Occ | B3LYP  |        |        |        | M06-HF |        |        |        |
|------|------------|------------------------|--------|-----|--------|--------|--------|--------|--------|--------|--------|--------|
|      |            |                        |        |     | Pr     |        | O      | C      | Pr     |        | O      | C      |
|      |            |                        |        |     | 5d     | 4f     | 2p     | 2p     | 5d     | 4f     | 2p     | 2p     |
| 3a'' |            | Pr-<br>4f              | -5.138 | 1   | 4.36%  | 81.62% |        |        |        | 96.47% |        |        |
| 5a'  |            | Pr-<br>4f              | -5.145 | 1   | 3.24%  | 79.24% |        |        |        | 94.18% | 3.53%  |        |
| 4a'  |            | $\pi_{\text{C-Pr}}$    | -5.589 | 1   | 2.35%  | 3.45%  | 5.01%  | 81.49% | 2.61%  |        | 7.27%  | 84.77% |
| 2a'' |            | $\pi_{\text{C-Pr}}$    | -5.910 | 1   | 6.85%  | 14.34% |        | 75.24% | 9.63%  |        | 1.63%  | 84.88% |
| 3a'  |            | $\sigma_{\text{C-Pr}}$ | -6.007 | 1   | 5.96%  | 11.62% |        | 71.68% | 5.93%  |        | 6.34%  | 77.04% |
| 2a'  |            | $\sigma_{\text{Pr-O}}$ | -7.413 | 2   | 7.40%  | 6.17%  | 61.54% |        | 18.65% | 4.95%  | 63.36% | 3.20%  |
| 1a'' |            | $\pi_{\text{Pr-O}}$    | -7.809 | 2   | 11.03% | 5.37%  | 77.02% |        | 15.97% | 1.48%  | 78.99% |        |
| 1a'  |            | $\pi_{\text{Pr-O}}$    | -7.853 | 2   | 10.44% | 4.05%  | 72.87% |        | 15.00% | 1.84%  | 69.45% | 7.54%  |

**Table S24.** Energies and percent compositions of the occupied valence molecular orbitals of SiOPr at the B3LYP and M06-HF levels of theory.

| MOs  | Isosurface | type                    | Energy | Occ | B3LYP  |        |       |        | M06-HF |        |       |        |
|------|------------|-------------------------|--------|-----|--------|--------|-------|--------|--------|--------|-------|--------|
|      |            |                         |        |     | Pr     |        | O     | Si     | Pr     |        | O     | Si     |
|      |            |                         |        |     | 5d     | 4f     | 2p    | 2p     | 5d     | 4f     | 2p    | 2p     |
| 5a'  |            | $\pi_{\text{Si-Pr}}$    | -3.742 | 1   | 45.15% | 2.36%  | 4.43% | 51.24% | 38.81% |        | 1.10% | 8.32%  |
| 4a'  |            | $\sigma_{\text{Si-Pr}}$ | -4.257 | 2   | 17.82% |        | 1.625 | 46.49% | 13.83% |        | 1.53% | 56.97% |
| 3a'  |            | Pr-<br>4f               | -5.514 | 1   |        | 97.37% |       |        |        | 86.14% | 4.95% |        |
| 2a'' |            | Pr-<br>4f               | -5.620 | 1   |        | 96.47% |       |        |        | 98.87% |       |        |

|      |  |                        |        |   |        |       |        |        |       |  |        |        |
|------|--|------------------------|--------|---|--------|-------|--------|--------|-------|--|--------|--------|
| 2a'  |  | $\sigma_{\text{Si-O}}$ | -7.974 | 2 |        |       | 27.44% | 15.38% |       |  | 24.41% | 15.52% |
| 1a'  |  | $\sigma_{\text{Pr-O}}$ | -9.283 | 2 | 10.22% | 1.13% | 75.49% | 4.38%  | 9.56% |  | 76.22% | 3.34%  |
| 1a'' |  | $\pi_{\text{Si-O}}$    | -9.508 | 2 | 7.86%  |       | 79.41% | 7.84%  | 5.47% |  | 81.96% | 5.55%  |

**Table S25.** Energies and percent compositions of the occupied valence molecular orbitals of NPrO at the B3LYP and M06-HF levels of theory.

| MOs        | Isosurface | type     | Energy | Occ | B3LYP  |        |        |        | M06-HF |        |        |        |
|------------|------------|----------|--------|-----|--------|--------|--------|--------|--------|--------|--------|--------|
|            |            |          |        |     | Pr     |        | O      | N      | Pr     |        | O      | N      |
|            |            |          |        |     | 5d     | 4f     | 2p     | 2p     | 5d     | 4f     | 2p     | 2p     |
| 2 $\sigma$ |            | $\sigma$ | -5.868 | 2   | 3.31%  | 58.03% | 2.51%  | 24.56% | 16.84% | 3.02%  | 35.87% | 28.52% |
| 2 $\pi'$   |            | $\pi$    | -6.746 | 2   | 9.13%  | 19.53% | 7.27%  | 62.69% | 9.96%  | 11.93% | 12.33% | 63.33% |
| 2 $\pi$    |            | $\pi$    | -6.746 | 2   | 9.13%  | 19.53% | 7.27%  | 62.69% | 9.96%  | 11.93% | 12.33% | 63.33% |
| 1 $\sigma$ |            | $\sigma$ | -8.305 | 2   | 11.79% | 5.74%  | 53.28% | 16.20% |        | 71.60% | 19.99% | 3.47%  |
| 1 $\pi'$   |            | $\pi$    | -9.112 | 2   | 15.22% | 2.38%  | 75.47% | 6.06%  | 17.26% | 1.03%  | 73.36% | 7.50%  |
| 1 $\pi$    |            | $\pi$    | -9.112 | 2   | 15.22% | 2.38%  | 75.47% | 6.06%  | 17.26% | 1.03%  | 73.36% | 7.50%  |

**Table S26.** Energies and percent compositions of the occupied valence molecular orbitals of PPrO at the B3LYP and M06-HF levels of theory.

| MOs        | Isosurface | type           | Energy | Occ | B3LYP  |        |        |        | M06-HF |        |        |        |
|------------|------------|----------------|--------|-----|--------|--------|--------|--------|--------|--------|--------|--------|
|            |            |                |        |     | Pr     |        | O      | P      | Pr     |        | O      | P      |
|            |            |                |        |     | 5d     | 4f     | 2p     | 2p     | 5d     | 4f     | 2p     | 2p     |
| 2 $\pi'$   |            | $\pi$          | -5.424 | 2   | 11.71% | 10.82% | 2.38%  | 73.09% | 20.79% | 14.52% | 2.25%  | 56.15% |
| 2 $\pi$    |            | $\pi$          | -5.424 | 2   | 11.71% | 10.82% | 2.38%  | 73.09% | 20.79% | 14.52% | 2.25%  | 56.15% |
| 2 $\sigma$ |            | $\sigma$       | -5.861 | 1   | 4.31%  | 45.37% |        | 47.21% | 4.70%  | 1.05%  | 4.28%  | 65.08% |
| 1 $\delta$ |            | Pr-4f $\delta$ | -6.520 | 1   |        | 99.92% |        |        | 1.09%  | 91.01% | 2.06%  |        |
| 1 $\sigma$ |            | $\sigma$       | -8.624 | 2   | 13.59% | 9.49%  | 58.74% | 9.20%  | 21.15% |        | 50.66% | 13.70% |



|          |                                                                                   |       |        |   |            |       |            |       |            |       |            |  |
|----------|-----------------------------------------------------------------------------------|-------|--------|---|------------|-------|------------|-------|------------|-------|------------|--|
| 1 $\pi'$ | 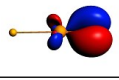 | $\pi$ | -9.086 | 2 | 14.10<br>% | 4.27% | 79.39<br>% | 1.13% | 15.40<br>% | 4.93% | 77.71<br>% |  |
| 1 $\pi$  |  | $\pi$ | -9.086 | 2 | 14.10<br>% | 4.27% | 79.39<br>% | 1.13% | 15.40<br>% | 4.93% | 77.71<br>% |  |

**Table S27.** Energies and percent compositions of the occupied valence molecular orbitals of AsPrO at the B3LYP and M06-HF levels of theory.

| MOs  | Isosurface                                                                          | type             | Energy | Occ | B3LYP  |        |        |        | M06-HF |        |        |        |
|------|-------------------------------------------------------------------------------------|------------------|--------|-----|--------|--------|--------|--------|--------|--------|--------|--------|
|      |                                                                                     |                  |        |     | Pr     |        | O      | As     | Pr     |        | O      | As     |
|      |                                                                                     |                  |        |     | 5d     | 4f     | 2p     | 2p     | 5d     | 4f     | 2p     | 2p     |
| 3a'' | 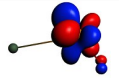   | Pr-4f            | -4.722 | 1   | 8.17%  | 87.09% | 2.02%  | 1.46%  |        | 94.67% | 3.11%  |        |
| 5a'  |    | Pr-4f            | -4.820 | 1   | 4.55%  | 83.24% |        | 5.73%  |        | 97.18% | 1.23%  |        |
| 4a'  |    | $\sigma_{As-Pr}$ | -5.485 | 2   | 6.60%  | 5.90%  |        | 76.29% | 2.56%  |        | 1.22%  | 81.37% |
| 3a'  |   | $\pi_{As-Pr}$    | -5.562 | 1   | 2.60%  | 1.06%  | 3.24%  | 90.53% | 2.36%  |        | 2.03%  | 92.90% |
| 2a'' |  | $\pi_{As-Pr}$    | -5.732 | 1   | 7.71%  |        |        | 90.60% | 5.68%  |        |        | 92.39% |
| 2a'  |  | $\sigma_{Pr-O}$  | -7.597 | 2   | 16.50% | 5.34%  | 66.45% |        | 21.64% | 4.03%  | 64.65% |        |
| 1a'  |  | $\pi_{Pr-O}$     | -8.019 | 2   | 15.36% | 4.42%  | 76.90% | 1.04%  | 15.93% | 1.79%  | 78.05% | 1.10%  |
| 1a'' |  | $\pi_{Pr-O}$     | -8.046 | 2   | 13.58% | 7.60%  | 76.64% |        | 16.43% | 3.14%  | 77.86% |        |

**Table S28.** Energies and percent compositions of the occupied valence molecular orbitals of PrO<sub>2</sub> at the B3LYP and M06-HF levels of theory.

| MOs          | Isosurface                                                                          | type             | Energy | Occ | B3LYP |            |            |            | M06-HF     |            |            |            |
|--------------|-------------------------------------------------------------------------------------|------------------|--------|-----|-------|------------|------------|------------|------------|------------|------------|------------|
|              |                                                                                     |                  |        |     | Pr    |            | O          | O          | Pr         |            | O          | O          |
|              |                                                                                     |                  |        |     | 5d    | 4f         | 2p         | 2p         | 5d         | 4f         | 2p         | 2p         |
| 1 $\sigma_u$ | 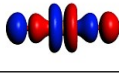 | $\sigma$         | -6.288 | 2   |       | 51.30<br>% | 20.30<br>% | 20.30<br>% | 16.65<br>% |            | 39.50<br>% | 39.50<br>% |
| 1 $\pi_u'$   |  | $\pi$            | -7.489 | 2   |       | 12.22<br>% | 42.56<br>% | 42.56<br>% |            | 9.25%      | 44.19<br>% | 44.19<br>% |
| 1 $\pi_u$    |  | $\pi$            | -7.489 | 2   |       | 12.22<br>% | 42.56<br>% | 42.56<br>% |            | 9.25%      | 44.19<br>% | 44.19<br>% |
| 1 $\sigma_g$ |  | O-<br>$p_\sigma$ | -8.407 | 2   |       | 15.71<br>% | 39.27<br>% | 39.27<br>% |            | 68.71<br>% | 14.22<br>% | 14.22<br>% |

|           |                                                                                   |                      |             |   |            |  |            |            |            |  |            |            |
|-----------|-----------------------------------------------------------------------------------|----------------------|-------------|---|------------|--|------------|------------|------------|--|------------|------------|
| $1\pi_g'$ | 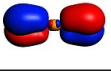 | O-<br>p <sub>π</sub> | -8.591      | 2 | 17.97<br>% |  | 40.74<br>% | 40.74<br>% | 16.08<br>% |  | 41.94<br>% | 41.94<br>% |
| $1\pi_g$  |  | O-<br>p <sub>π</sub> | -<br>15.681 | 2 | 17.97<br>% |  | 40.74<br>% | 40.74<br>% | 16.08<br>% |  | 41.94<br>% | 41.94<br>% |

**Table S29.** Energies and percent compositions of the occupied valence molecular orbitals of PrO<sub>2</sub><sup>+</sup> at the B3LYP and M06-HF levels of theory.

| MOs         | Isosurface                                                                          | type                 | Energy      | Occ | B3LYP      |            |            |            | M06-HF     |            |            |            |
|-------------|-------------------------------------------------------------------------------------|----------------------|-------------|-----|------------|------------|------------|------------|------------|------------|------------|------------|
|             |                                                                                     |                      |             |     | Pr         |            | O          | O          | Pr         |            | O          | O          |
|             |                                                                                     |                      |             |     | 5d         | 4f         | 2p         | 2p         | 5d         | 4f         | 2p         | 2p         |
| $1\sigma_u$ | 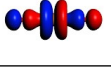   | σ                    | -<br>14.388 | 2   |            | 61.90<br>% | 28.40<br>% |            |            | 73.42<br>% | 22.11<br>% |            |
| $1\pi_u'$   |    | π                    | -<br>15.927 | 2   |            | 21.14<br>% | 75.20<br>% |            |            | 14.23<br>% | 82.55<br>% |            |
| $1\pi_u$    |    | π                    | -<br>15.927 | 2   |            | 21.14<br>% | 75.20<br>% |            |            | 14.23<br>% | 82.55<br>% |            |
| $1\sigma_g$ |    | O-<br>p <sub>σ</sub> | -<br>16.644 | 2   | 14.98<br>% |            |            | 76.17<br>% | 17.47<br>% |            |            | 74.02<br>% |
| $1\pi_g'$   |  | O-<br>p <sub>π</sub> | -<br>17.269 | 2   | 17.88<br>% |            |            | 81.70<br>% | 18.73<br>% |            |            | 80.67<br>% |
| $1\pi_g$    |  | O-<br>p <sub>π</sub> | -<br>17.269 | 2   | 17.88<br>% |            |            | 81.70<br>% | 18.73<br>% |            |            | 80.67<br>% |

**Table S30.** Energies and percent compositions of the occupied valence molecular orbitals of SPrO at the B3LYP and M06-HF levels of theory.

| MOs    | Isosurface                                                                          | type               | Energy | Occ | B3LYP  |        |        |        | M06-HF |        |        |        |
|--------|-------------------------------------------------------------------------------------|--------------------|--------|-----|--------|--------|--------|--------|--------|--------|--------|--------|
|        |                                                                                     |                    |        |     | Pr     |        | O      | S      | Pr     |        | O      | S      |
|        |                                                                                     |                    |        |     | 5d     | 4f     | 2p     | 2p     | 5d     | 4f     | 2p     | 2p     |
| $5a'$  | 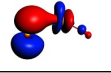 | π <sub>Si-Pr</sub> | -6.019 | 2   | 5.28%  | 23.16% | 1.36%  | 68.03% | 5.31%  | 6.40%  | 3.23%  | 77.00% |
| $2a''$ |  | π <sub>Si-Pr</sub> | -6.200 | 2   | 13.13% | 6.19%  | 1.48%  | 78.39% | 16.84% | 3.94%  | 1.60%  | 72.12% |
| $4a'$  |  | σ <sub>Si-Pr</sub> | -6.234 | 2   | 13.32% | 10.86% | 2.53%  | 67.20% | 15.20% |        | 5.85%  | 70.16% |
| $3a'$  |  | Pr-<br>4f          | -6.836 | 1   |        | 98.75% |        |        |        | 66.55% |        |        |
| $2a'$  |  | σ <sub>Pr-O</sub>  | -8.687 | 2   | 14.68% | 7.55%  | 72.18% | 5.44%  | 14.53% | 2.65%  | 71.49% | 4.45%  |
| $1a'$  |  | π <sub>Pr-O</sub>  | -9.083 | 2   | 8.77%  | 5.27%  | 75.82% | 2.49%  | 16.57% | 5.61%  | 67.64% | 1.55%  |

|      |  |                     |        |   |        |       |        |  |        |       |        |  |
|------|--|---------------------|--------|---|--------|-------|--------|--|--------|-------|--------|--|
| 1a'' |  | $\pi_{\text{Pr-O}}$ | -9.108 | 2 | 13.77% | 5.67% | 77.88% |  | 16.01% | 5.46% | 75.82% |  |
|------|--|---------------------|--------|---|--------|-------|--------|--|--------|-------|--------|--|

**Table S31.** Energies and percent compositions of the occupied valence molecular orbitals of SPrO<sup>+</sup> at the B3LYP and M06-HF levels of theory.

| MOs        | Isosurface | type     | Energy  | Occ | B3LYP  |        |        |        | M06-HF |        |        |        |
|------------|------------|----------|---------|-----|--------|--------|--------|--------|--------|--------|--------|--------|
|            |            |          |         |     | Pr     |        | O      | S      | Pr     |        | O      | S      |
|            |            |          |         |     | 5d     | 4f     | 2p     | 2p     | 5d     | 4f     | 2p     | 2p     |
| 2 $\sigma$ |            | $\sigma$ | -12.837 | 2   | 4.16%  | 49.70% |        | 42.75% |        | 76.52% | 18.14% |        |
| 2 $\pi'$   |            | $\pi$    | -12.889 | 2   | 8.09%  | 13.19% | 1.74%  | 76.24% | 7.05%  | 5.21%  | 4.18%  | 80.45% |
| 2 $\pi$    |            | $\pi$    | -12.889 | 2   | 8.09%  | 13.19% | 1.74%  | 76.24% | 7.05%  | 5.21%  | 4.18%  | 80.45% |
| 1 $\sigma$ |            | $\sigma$ | -15.484 | 2   | 13.73% | 10.61% | 54.90% | 11.66% | 22.37% | 6.33%  | 33.00% | 28.45% |
| 1 $\pi'$   |            | $\pi$    | -16.077 | 2   | 13.34% | 6.55%  | 77.47% | 1.73%  | 15.11% | 3.07%  | 78.14% | 2.21%  |
| 1 $\pi$    |            | $\pi$    | -16.077 | 2   | 13.34% | 6.55%  | 77.47% | 1.73%  | 15.11% | 3.07%  | 78.14% | 2.21%  |

**Table S32.** Energies and percent compositions of the occupied valence molecular orbitals of FPrO at the B3LYP and M06-HF levels of theory.

| MOs  | Isosurface | type                   | Energy | Occ | B3LYP  |        |        |        | M06-HF |        |        |        |
|------|------------|------------------------|--------|-----|--------|--------|--------|--------|--------|--------|--------|--------|
|      |            |                        |        |     | Pr     |        | O      | F      | Pr     |        | O      | F      |
|      |            |                        |        |     | 5d     | 4f     | 2p     | 2p     | 5d     | 4f     | 2p     | 2p     |
| 3a'' |            | Pr-4f                  | -4.282 | 1   | 13.01% | 80.37% | 2.35%  |        |        | 77.62% | 2.60%  | 14.93% |
| 5a'  |            | Pr-4f                  | -4.585 | 1   | 2.56%  | 94.02% |        |        | 1.93%  | 65.46% | 5.12%  | 25.07% |
| 4a'  |            | $\sigma_{\text{Pr-O}}$ | -6.997 | 2   | 10.95% | 8.44%  | 66.91% | 4.91%  | 19.97% | 3.21%  | 67.19% | 2.05%  |
| 3a'  |            | $\pi_{\text{Pr-O}}$    | -7.345 | 2   | 9.27%  | 7.74%  | 74.61% | 4.28%  | 9.45%  | 4.40%  | 76.45% | 4.66%  |
| 2a'' |            | $\pi_{\text{Pr-O}}$    | -7.501 | 2   | 14.40% | 3.45%  | 78.61% |        | 15.79% | 2.49%  | 78.94% |        |
| 1a'' |            | $\pi_{\text{F-Pr}}$    | -9.574 | 2   | 3.35%  |        |        | 93.70% | 2.07%  |        |        | 95.28% |
| 2a'  |            | $\pi_{\text{F-Pr}}$    | -9.578 | 2   | 3.93%  | 1.01%  | 1.04%  | 91.30% | 2.36%  | 12.76% |        | 81.49% |

|     |  |                        |        |   |       |       |       |        |  |        |       |        |
|-----|--|------------------------|--------|---|-------|-------|-------|--------|--|--------|-------|--------|
| 1a' |  | $\sigma_{\text{F-Pr}}$ | -9.790 | 2 | 6.01% | 1.11% | 3.31% | 83.48% |  | 34.36% | 1.22% | 58.54% |
|-----|--|------------------------|--------|---|-------|-------|-------|--------|--|--------|-------|--------|

**Table S33.** Energies and percent compositions of the occupied valence molecular orbitals of F<sub>3</sub>PrO at the B3LYP and M06-HF levels of theory.

| MOs  | Isosurface | type                   | Energy  | Occ | B3LYP |        |        |        | M06-HF |        |        |        |
|------|------------|------------------------|---------|-----|-------|--------|--------|--------|--------|--------|--------|--------|
|      |            |                        |         |     | Pr    |        | O      | F      | Pr     |        | O      | F      |
|      |            |                        |         |     | 5d    | 4f     | 2p     | 2p     | 5d     | 4f     | 2p     | 2p     |
| 3a'  |            | $\sigma_{\text{Pr-O}}$ | -10.092 | 2   | 2.34% | 14.92% | 38.56% | 34.04% | 1.11%  | 28.39% | 12.44% | 53.28% |
| 3a'' |            | $\pi_{\text{Pr-O}}$    | -10.497 | 2   | 1.12% | 8.53%  | 50.57% | 36.60% | 1.26%  | 10.58% | 47.74% | 37.62% |
| 2a'  |            | $\pi_{\text{Pr-O}}$    | -10.516 | 2   |       | 7.83%  | 50.59% | 36.39% |        | 10.34% | 45.56% | 39.63% |
| 2a'' |            | $\pi_{\text{F-Pr}}$    | -11.628 | 2   |       | 8.42%  | 11.38% | 79.58% |        | 3.39%  | 12.87% | 82.55% |
| 1a'  |            | $\pi_{\text{F-Pr}}$    | -11.650 | 2   |       | 6.68%  | 12.14% | 78.46% | 3.67%  | 7.80%  | 9.58%  | 74.41% |
| 1a'' |            | $\sigma_{\text{F-Pr}}$ | -11.693 | 2   |       | 6.08%  |        | 93.90% |        | 1.37%  |        | 97.21% |

**Table S34.** Energies and percent compositions of the occupied valence molecular orbitals of ClPrO at the B3LYP and M06-HF levels of theory.

| MOs  | Isosurface | type                   | Energy | Occ | B3LYP  |        |        |        | M06-HF |        |        |        |
|------|------------|------------------------|--------|-----|--------|--------|--------|--------|--------|--------|--------|--------|
|      |            |                        |        |     | Pr     |        | O      | Cl     | Pr     |        | O      | Cl     |
|      |            |                        |        |     | 5d     | 4f     | 2p     | 2p     | 5d     | 4f     | 2p     | 2p     |
| 6a'  |            | Pr-4f                  | -4.798 | 1   | 4.87%  | 93.94% |        |        |        | 98.30% |        |        |
| 5a'  |            | Pr-4f                  | -4.820 | 1   | 3.29%  | 92.80% |        |        | 3.82%  | 92.73% |        |        |
| 4a'  |            | $\sigma_{\text{Pr-O}}$ | -7.147 | 2   | 3.70%  | 4.09%  | 39.27% | 46.54% | 2.48%  | 4.34%  | 36.35% | 50.84% |
| 2a'' |            | $\pi_{\text{Cl-Pr}}$   | -7.590 | 2   | 3.17%  |        | 11.31% | 83.34% | 1.92%  |        | 5.67%  | 89.27% |
| 3a'  |            | $\pi_{\text{Pr-O}}$    | -7.614 | 2   | 5.93%  | 2.65%  | 48.13% | 38.23% | 8.12%  | 1.76%  | 36.83% | 48.60% |
| 2a'  |            | $\pi_{\text{Cl-Pr}}$   | -7.902 | 2   | 10.46% |        | 30.08% | 49.51% | 14.42% |        | 47.15% | 33.01% |
| 1a'' |            | $\pi_{\text{Pr-O}}$    | -8.084 | 2   | 15.31% | 4.14%  | 66.63% | 11.77% | 16.87% | 1.71%  | 73.37% | 5.64%  |

|     |                                                                                   |                         |        |   |        |       |        |        |        |       |        |        |
|-----|-----------------------------------------------------------------------------------|-------------------------|--------|---|--------|-------|--------|--------|--------|-------|--------|--------|
| 1a' | 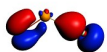 | $\sigma_{\text{Cl-Pr}}$ | -8.464 | 2 | 13.32% | 1.23% | 31.69% | 50.13% | 13.04% | 1.32% | 27.45% | 51.58% |
|-----|-----------------------------------------------------------------------------------|-------------------------|--------|---|--------|-------|--------|--------|--------|-------|--------|--------|

**Table S35.** Energies and percent compositions of the occupied valence molecular orbitals of  $\text{Cl}_3\text{PrO}$  at the B3LYP and M06-HF levels of theory.

| MOs  | Isosurface                                                                          | type                    | Energy | Occ | B3LYP |       |       |        | M06-HF |       |       |        |
|------|-------------------------------------------------------------------------------------|-------------------------|--------|-----|-------|-------|-------|--------|--------|-------|-------|--------|
|      |                                                                                     |                         |        |     | Pr    |       | O     | Cl     | Pr     |       | O     | Cl     |
|      |                                                                                     |                         |        |     | 5d    | 4f    | 2p    | 2p     | 5d     | 4f    | 2p    | 2p     |
| 3a'  |    | $\sigma_{\text{Pr-O}}$  | -9.139 | 2   |       | 3.31% | 6.46% | 86.99% | 5.12%  |       | 1.34% | 82.69% |
| 3a'' |    | $\pi$                   | -9.230 | 2   |       |       | 2.13% | 96.34% |        |       |       | 96.31% |
| 2a'  |    | $\pi$                   | -9.232 | 2   |       |       | 3.05% | 93.35% |        |       |       | 95.33% |
| 2a'' |    | $\sigma_{\text{Cl-Pr}}$ | -9.268 | 2   |       | 8.70% |       | 91.20% |        | 1.55% |       | 96.97% |
| 1a'' |    | $\pi_{\text{Cl-Pr}}$    | -9.575 | 2   | 2.76% | 9.02% | 5.76% | 82.57% | 5.58%  |       | 3.12% | 87.65% |
| 1a'  |  | $\pi_{\text{Cl-Pr}}$    | -9.599 | 2   | 1.91% | 8.63% | 4.13% | 84.16% | 1.04%  |       | 1.59% | 92.57% |

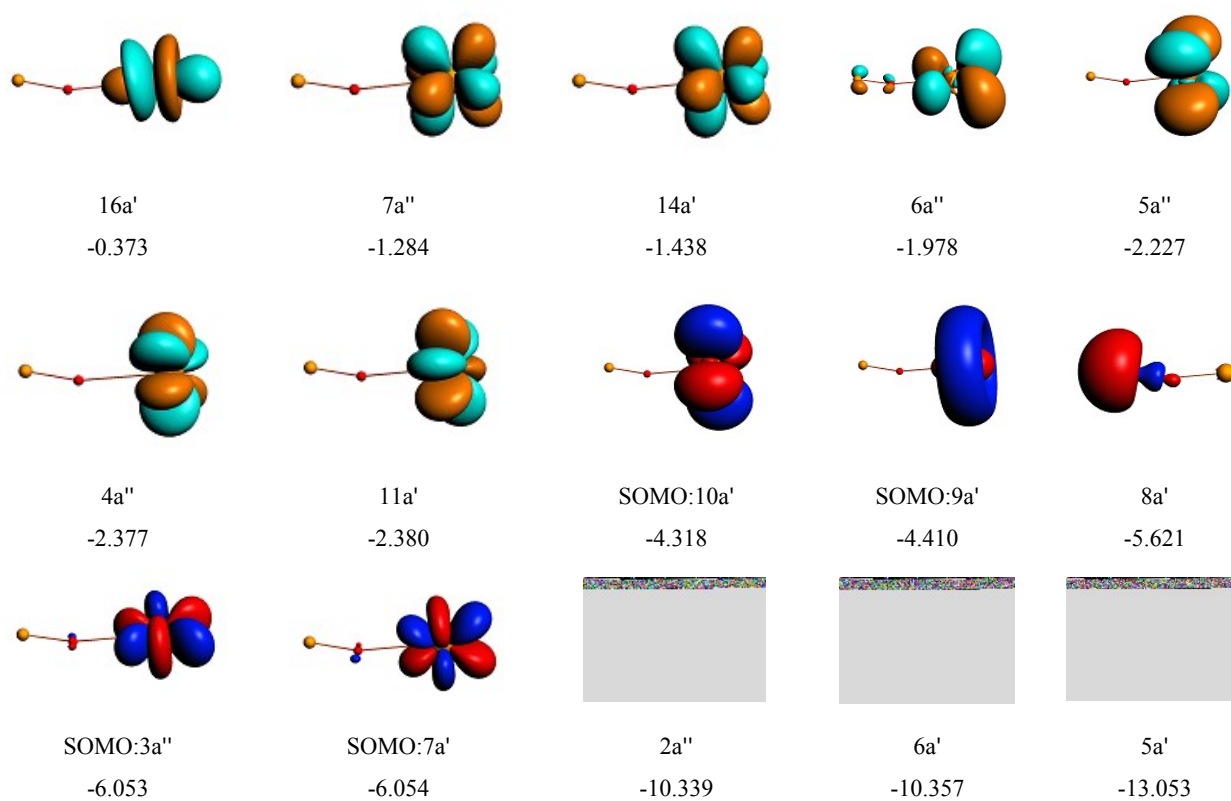

**Figure S1.** Frontier Kohn–Sham molecule orbitals of the BOPr complex. The value of the contour isovalues is 0.05 a.u. Only the alpha spin orbitals are presented, with the colors of blue and red for the phases of the occupied orbitals in contrast to that of yellow and cyan for the phases of the virtual orbitals.

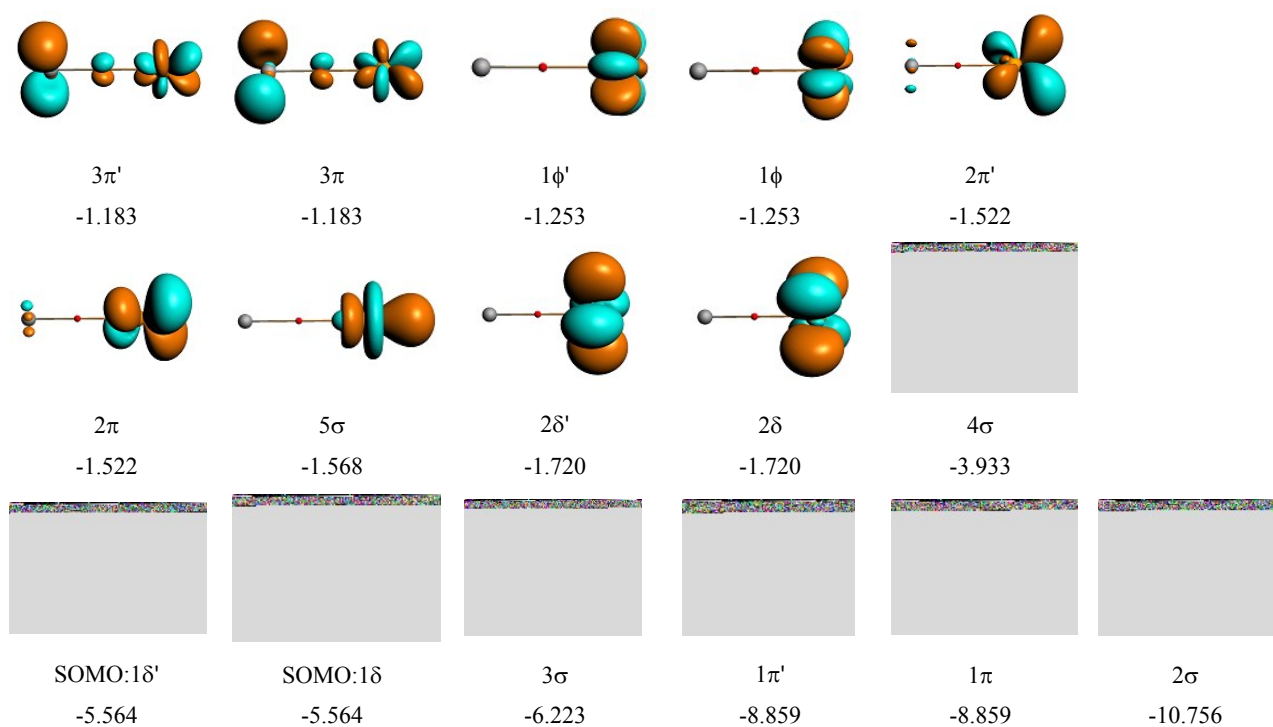

**Figure S2.** Frontier Kohn–Sham molecule orbitals of the AlOPr complex. The value of the contour isovalues is 0.05 a.u. Only the alpha spin orbitals are presented, with the colors of blue and red for the phases of the occupied orbitals in contrast to that of yellow and cyan for the phases of the virtual orbitals.

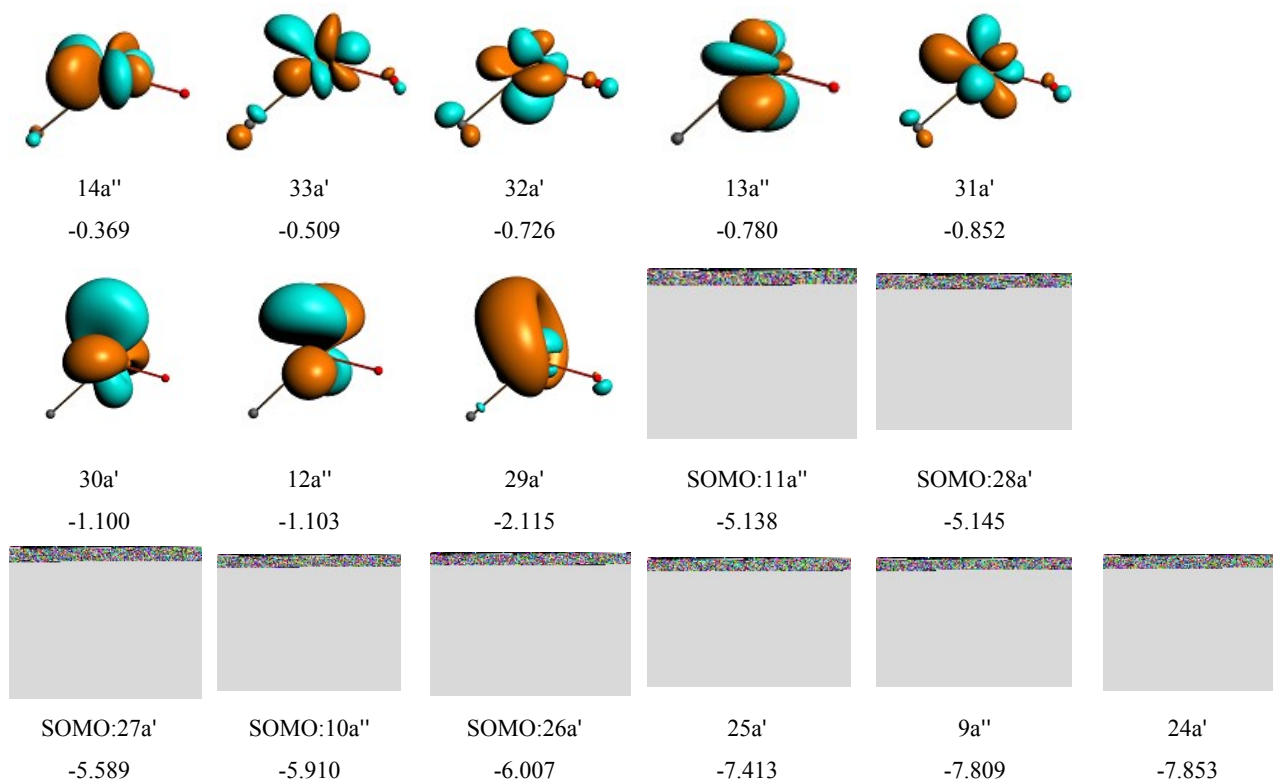

**Figure S3.** Frontier Kohn–Sham molecule orbitals of the CPrO complex. The value of the contour isovalues is 0.05 a.u. Only the alpha spin orbitals are presented, with the colors of blue and red for the phases of the occupied orbitals in contrast to that of yellow and cyan for the phases of the virtual orbitals.



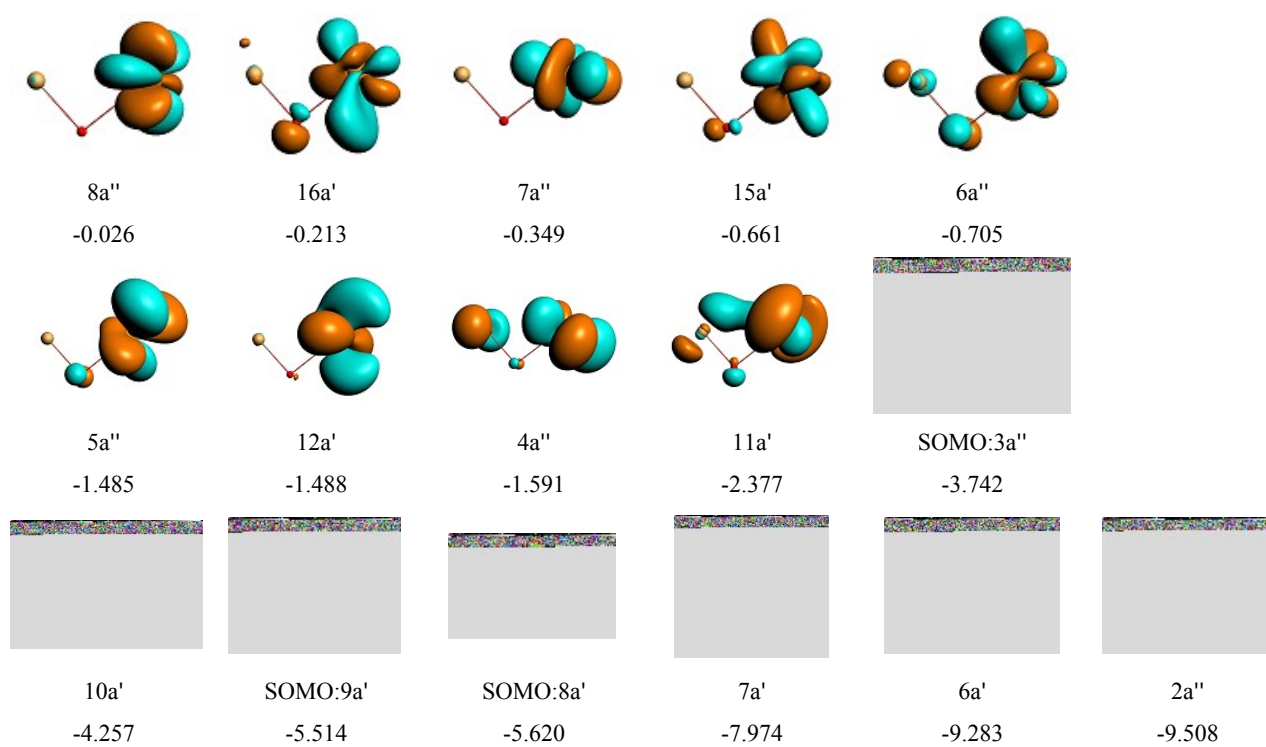

**Figure S4.** Frontier Kohn–Sham molecule orbitals of the SiOPr complex. The value of the contour isovalues is 0.05 a.u. Only the alpha spin orbitals are presented, with the colors of blue and red for the phases of the occupied orbitals in contrast to that of yellow and cyan for the phases of the virtual orbitals.

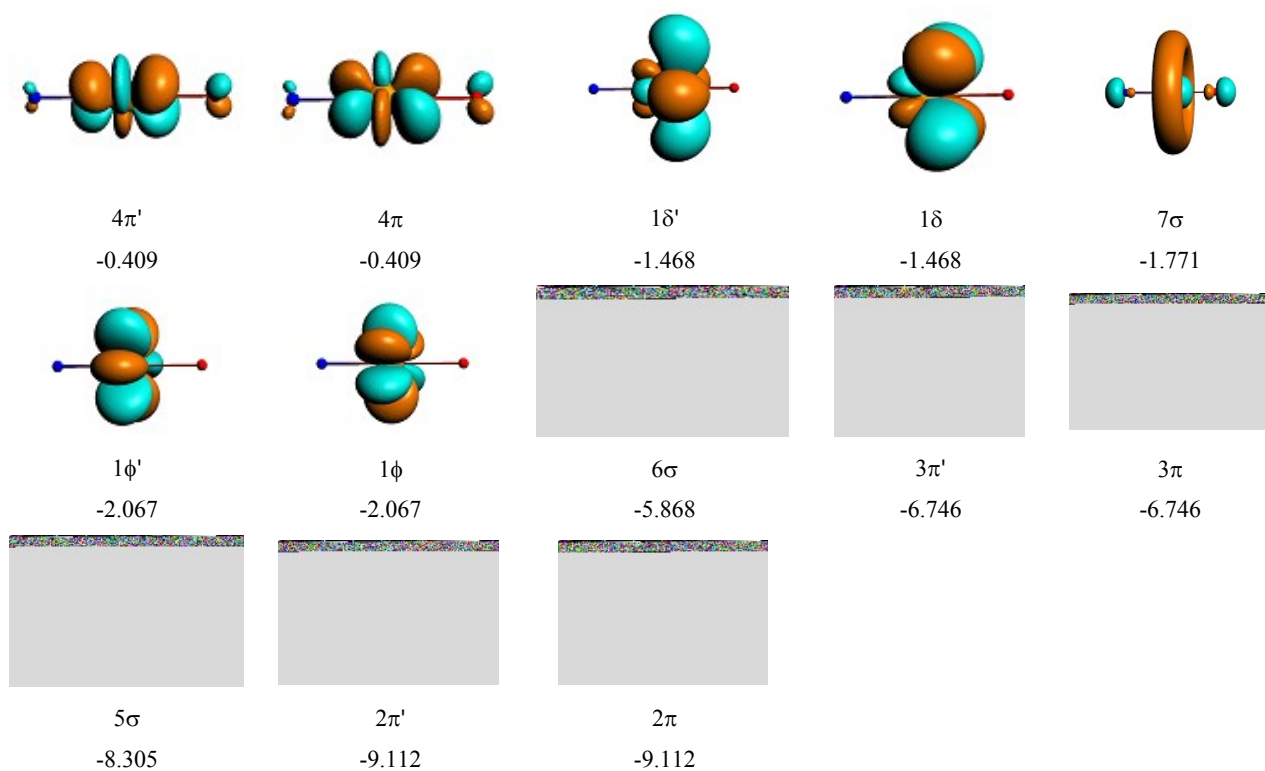

**Figure S5.** Frontier Kohn–Sham molecule orbitals of the NPrO complex. The value of the contour isovalues is 0.05 a.u. Only the alpha spin orbitals are presented, with the colors of blue and red for the phases of the occupied orbitals in contrast to that of yellow and cyan for the phases of the virtual orbitals.

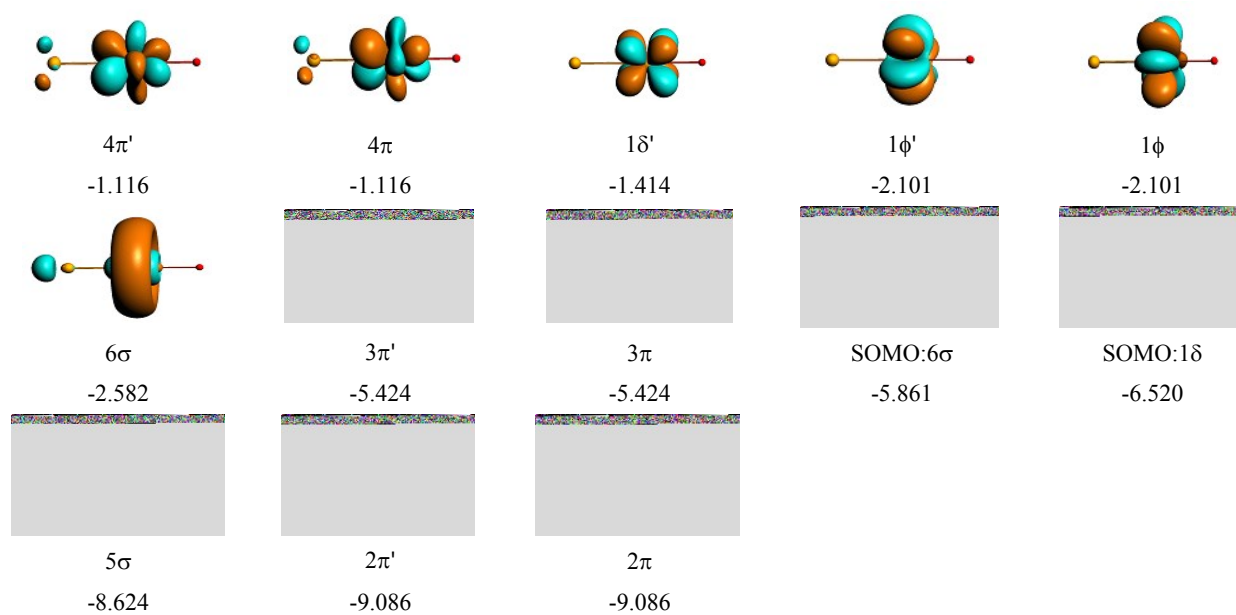

**Figure S6.** Frontier Kohn–Sham molecule orbitals of the PPrO complex. The value of the contour isovalues is 0.05 a.u. Only the alpha spin orbitals are presented, with the colors of blue and red for the phases of the occupied orbitals in contrast to that of yellow and cyan for the phases of the virtual orbitals.

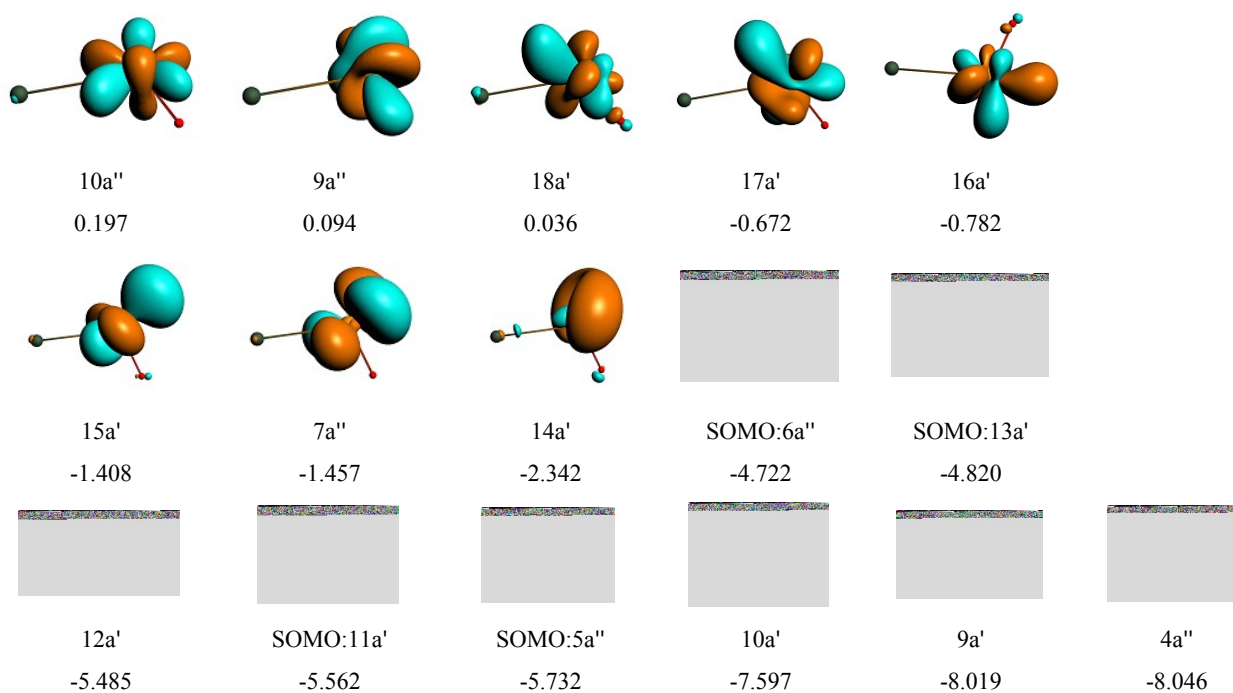

**Figure S7.** Frontier Kohn–Sham molecule orbitals of the AsPrO complex. The value of the contour isovalues is 0.05 a.u. Only the alpha spin orbitals are presented, with the colors of blue and red for the phases of the occupied orbitals in contrast to that of yellow and cyan for the phases of the virtual orbitals.

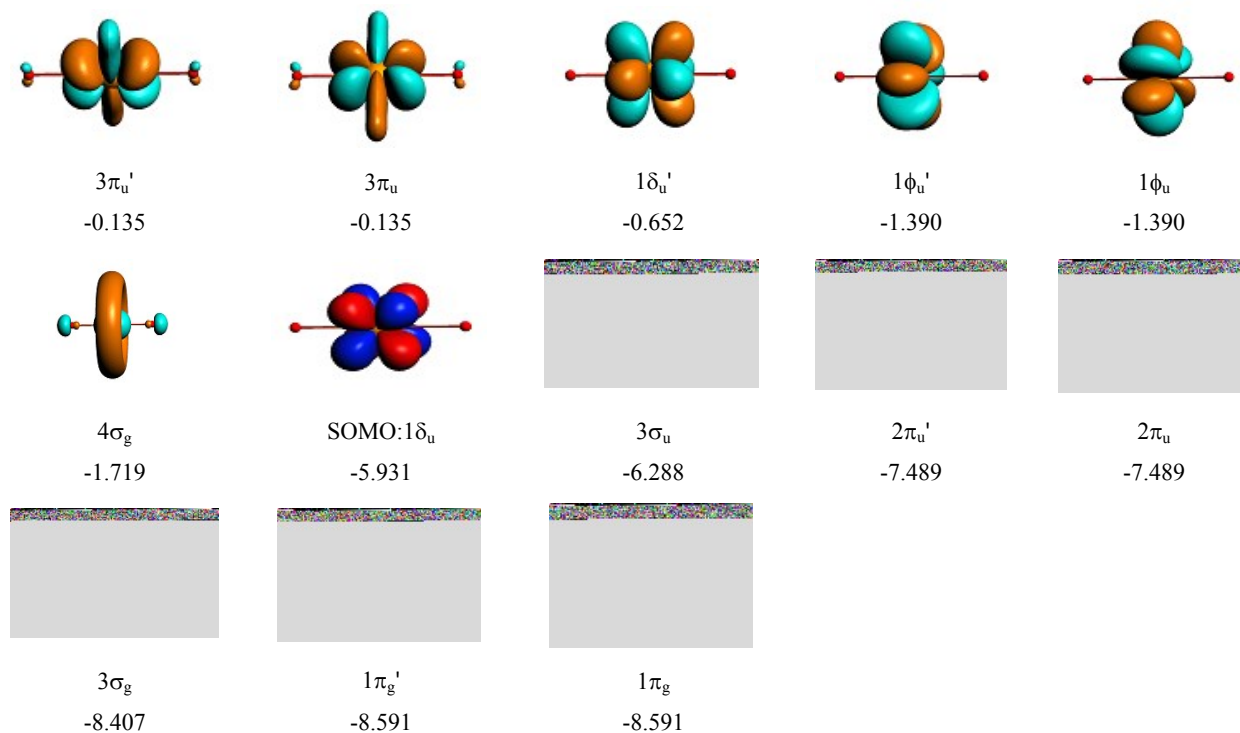

**Figure S8.** Frontier Kohn–Sham molecule orbitals of the PrO<sub>2</sub> complex. The value of the contour isovalues is 0.05 a.u. Only the alpha spin orbitals are presented, with the colors of blue and red for the phases of the occupied orbitals in contrast to that of yellow and cyan for the phases of the virtual orbitals.

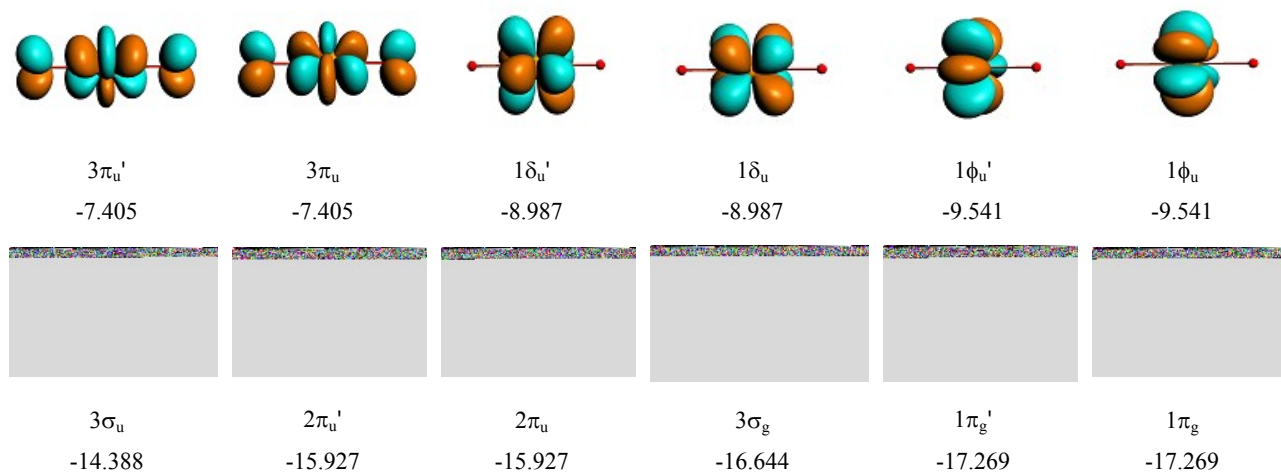

**Figure S9.** Frontier Kohn–Sham molecule orbitals of the  $[\text{PrO}_2]^+$  complex. The value of the contour isovalues is 0.05 a.u. Only the alpha spin orbitals are presented, with the colors of blue and red for the phases of the occupied orbitals in contrast to that of yellow and cyan for the phases of the virtual orbitals.

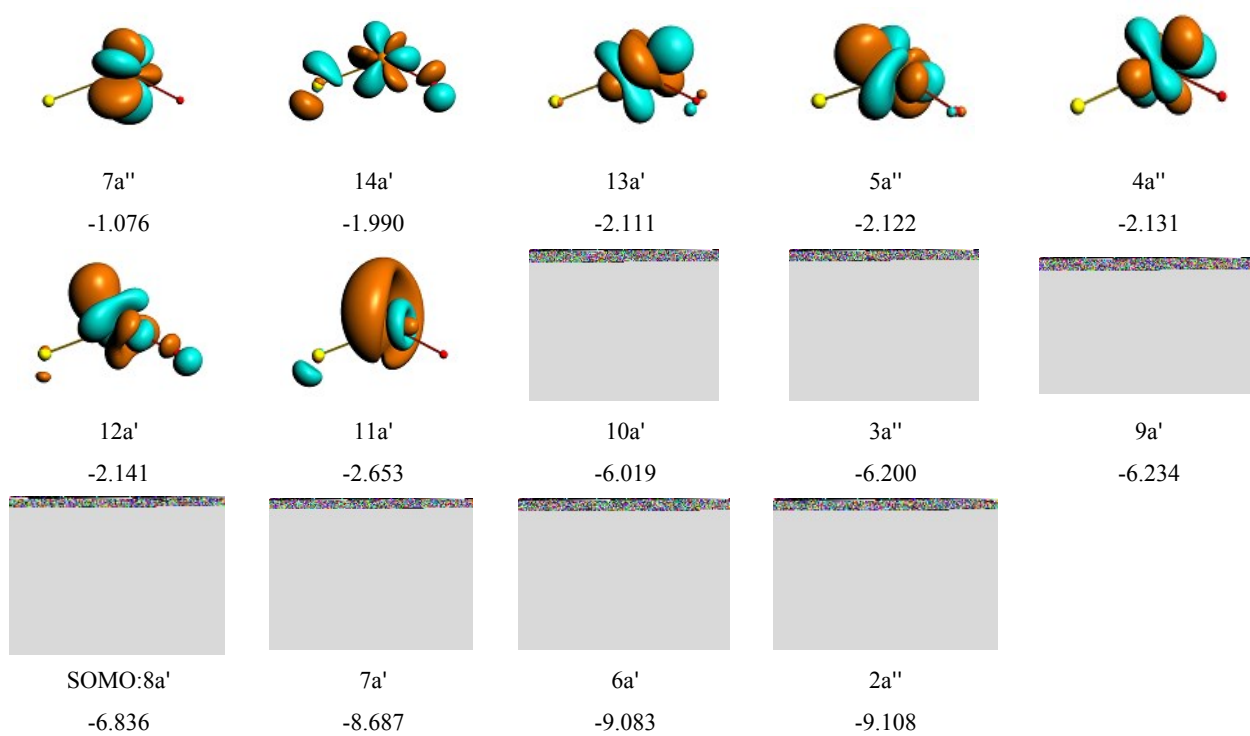

**Figure S10.** Frontier Kohn–Sham molecule orbitals of the SPrO complex. The value of the contour isovalues is 0.05 a.u. Only the alpha spin orbitals are presented, with the colors of blue and red for the phases of the occupied orbitals in contrast to that of yellow and cyan for the phases of the virtual orbitals.

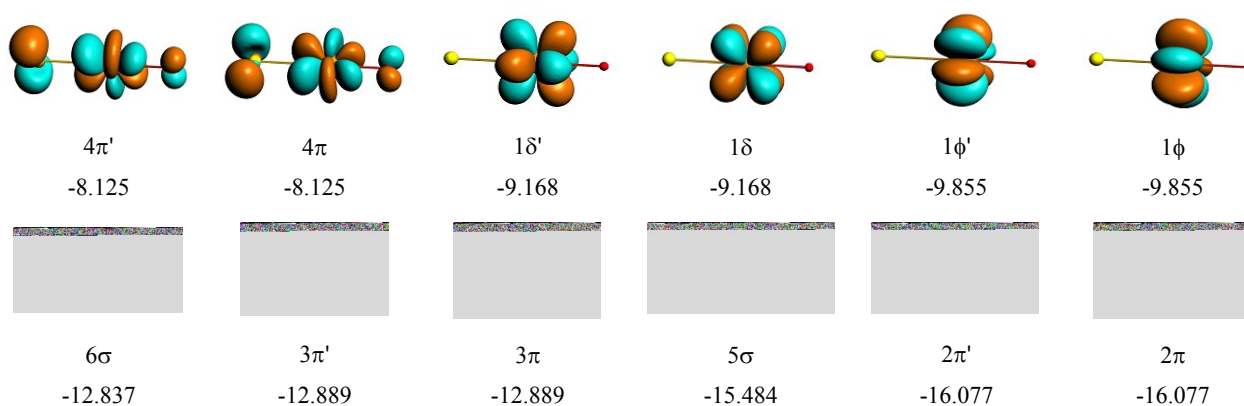

**Figure S11.** Frontier Kohn–Sham molecule orbitals of the  $[\text{SPrO}]^+$  complex. The value of the contour isovalues is 0.05 a.u. Only the alpha spin orbitals are presented, with the colors of blue and red for the phases of the occupied orbitals in contrast to that of yellow and cyan for the phases of the virtual orbitals.



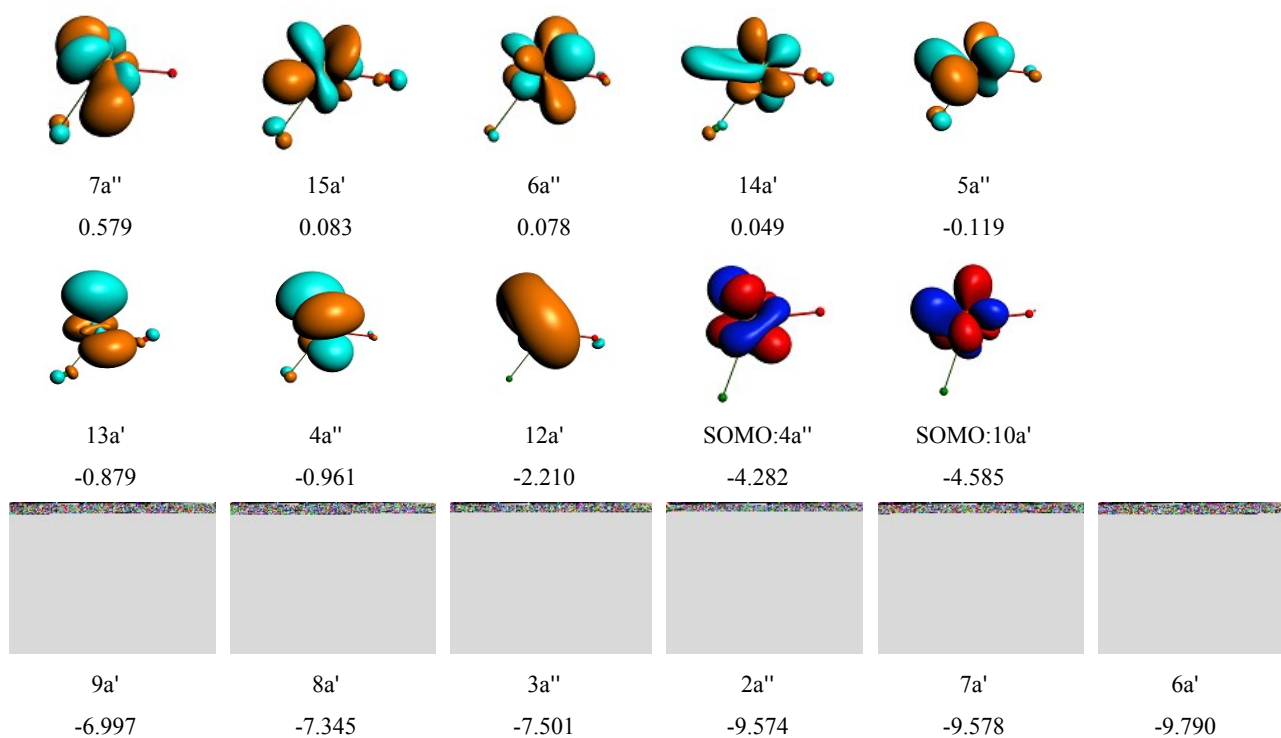

**Figure S12.** Frontier Kohn–Sham molecule orbitals of the FPrO complex. The value of the contour isovalues is 0.05 a.u. Only the alpha spin orbitals are presented, with the colors of blue and red for the phases of the occupied orbitals in contrast to that of yellow and cyan for the phases of the virtual orbitals.

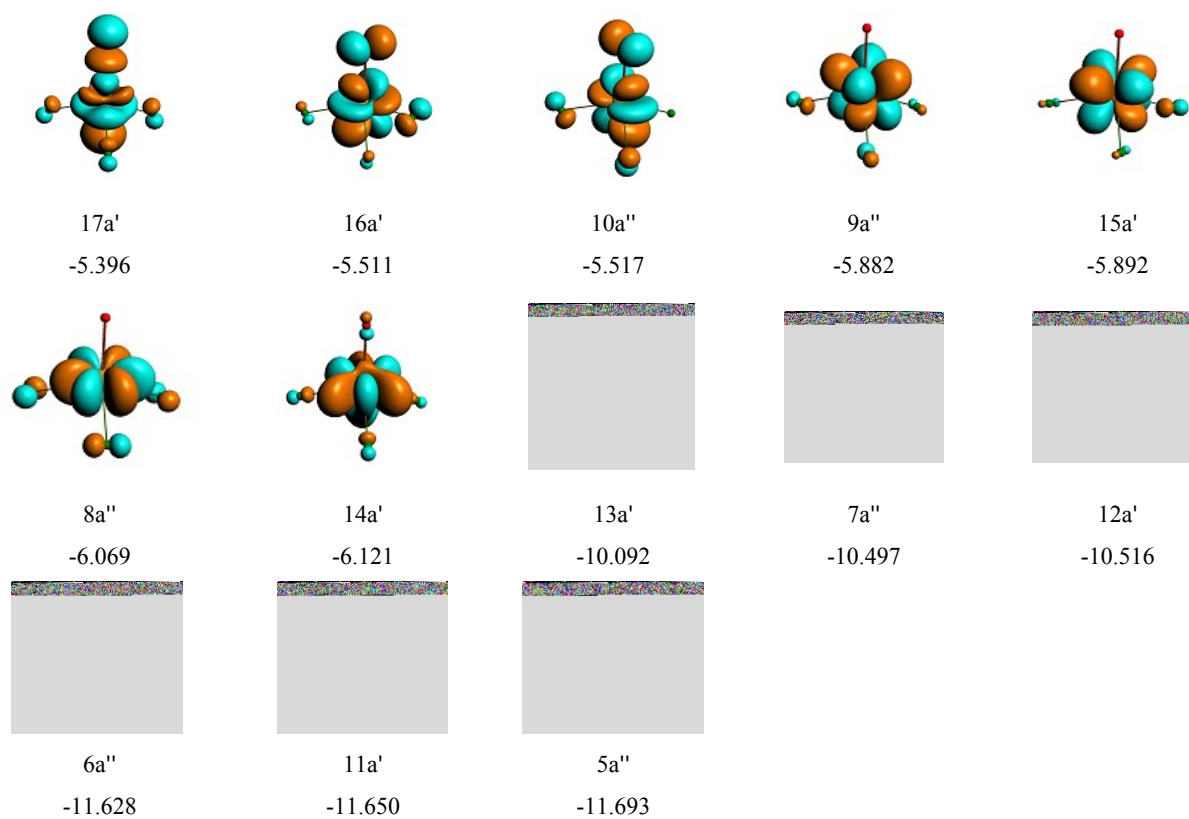

**Figure S13.** Frontier Kohn–Sham molecule orbitals of the  $F_3PrO$  complex. The value of the contour isovalues is 0.05 a.u. Only the alpha spin orbitals are presented, with the colors of blue and red for the phases of the occupied orbitals in contrast to that of yellow and cyan for the phases of the virtual orbitals.

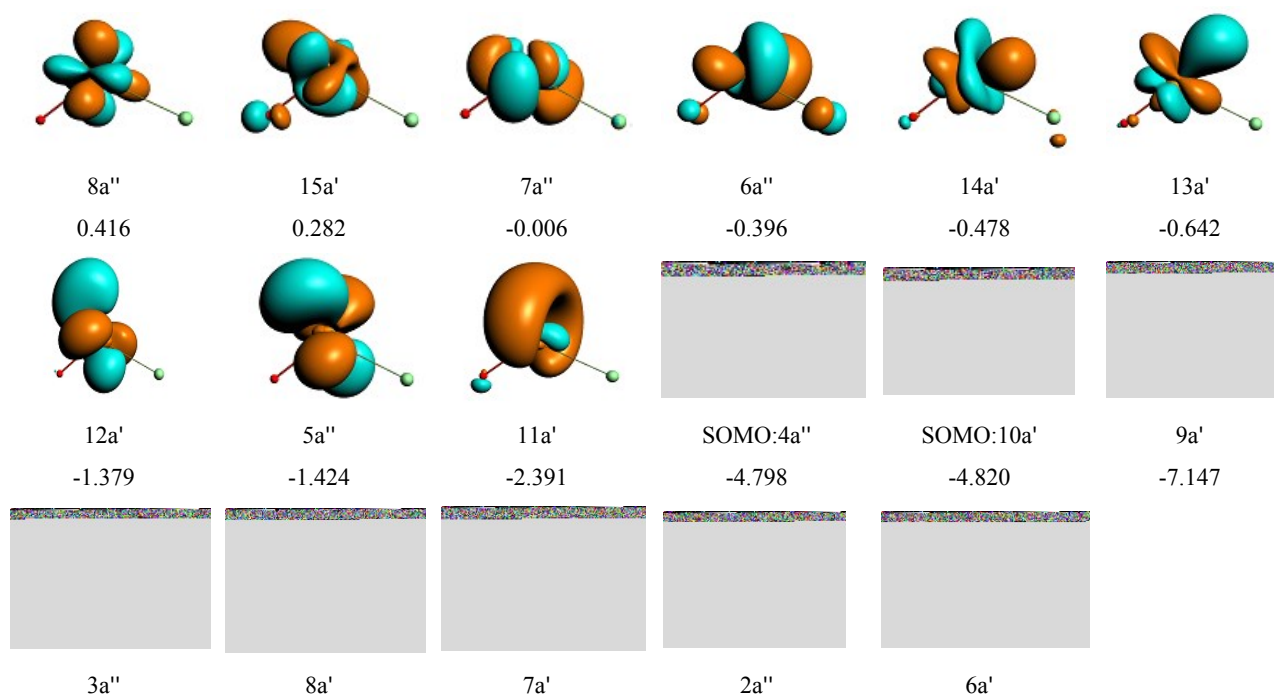

-7.590

-7.614

-7.902

-8.084

-8.464

**Figure S14.** Frontier Kohn–Sham molecule orbitals of the ClPrO complex. The value of the contour isovalues is 0.05 a.u. Only the alpha spin orbitals are presented, with the colors of blue and red for the phases of the occupied orbitals in contrast to that of yellow and cyan for the phases of the virtual orbitals.

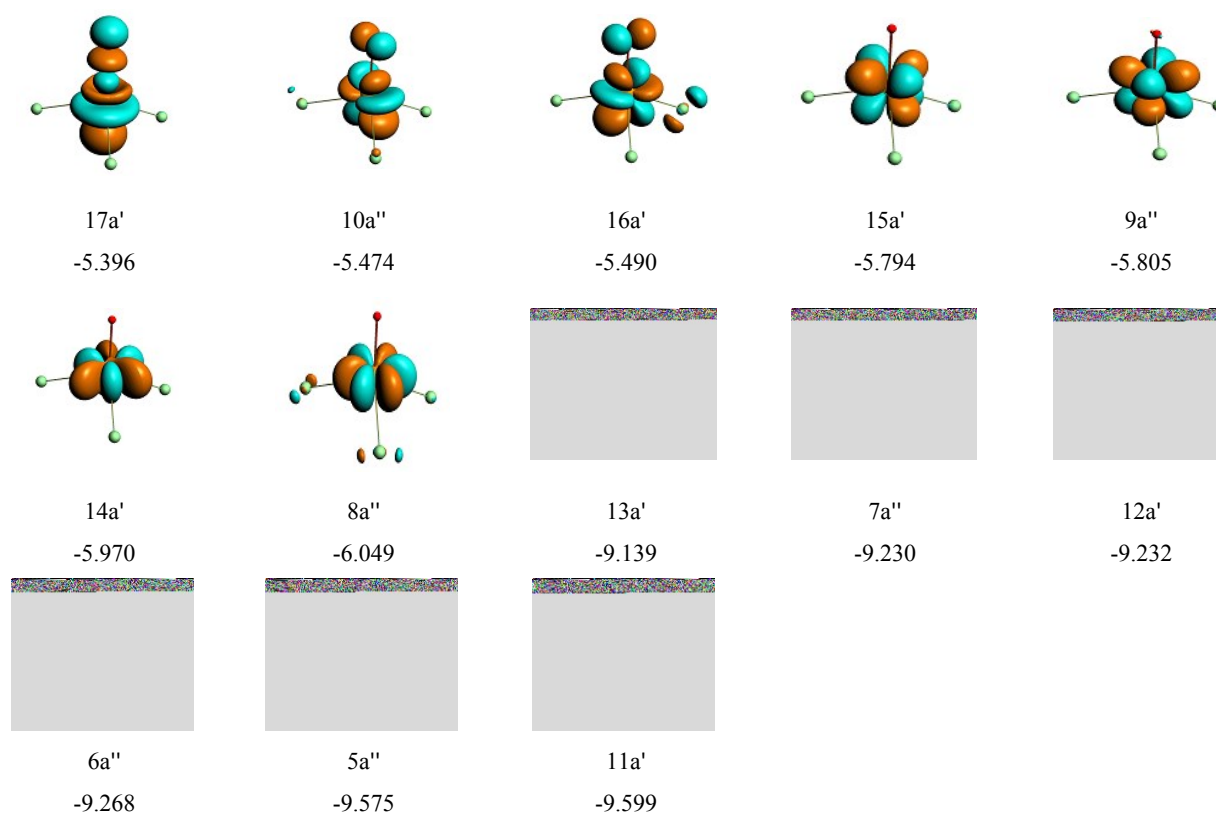

**Figure S15.** Frontier Kohn–Sham molecule orbitals of the  $\text{Cl}_3\text{PrO}$  complex. The value of the contour isovalues is 0.05 a.u. Only the alpha spin orbitals are presented, with the colors of blue and red for the phases of the occupied orbitals in contrast to that of yellow and cyan for the phases of the virtual orbitals.

#### Reference

1. S.-X. Hu, J. Jian, J. Su, X. Wu, J. Li and M. Zhou, *Chem. Sci.*, 2017,8, 4035–4043.
2. Q. Zhang, S. X. Hu, H. Qu, J. Su, G. Wang, J. B. Lu, M. Chen, M. Zhou and J. Li, *Angew. Chem.-Int. Edit.*, 2016, **55**, 6896–6900.
3. T. Mikulas, M. Y. Chen, D. A. Dixon, K. A. Peterson, Y. Gong and L. Andrews, *Inorg. Chem.*, 2014, **53**, 446–456.
